# Supplementary material for: Mechanochemical asymmetric three-component Mannich reaction involving unreactive arylamines
Source: Royal Society of Chemistry journal article supplement (doi:10.1039/d3ob00954h), 2023-01-01
Supplement: d3ob00954h1.pdf [file d3ob00954h1.pdf]

*Supplementary information for*

Mechanochemical Asymmetric Three-Component Mannich

Reaction involving unreactive anilines

**Table of Contents**

**I. NMR spectra**

**II. HPLC spectra**

# I NMR spectra

<sup>1</sup>H NMR Spectrum (600 MHz, Chloroform-*d*) of **2a**

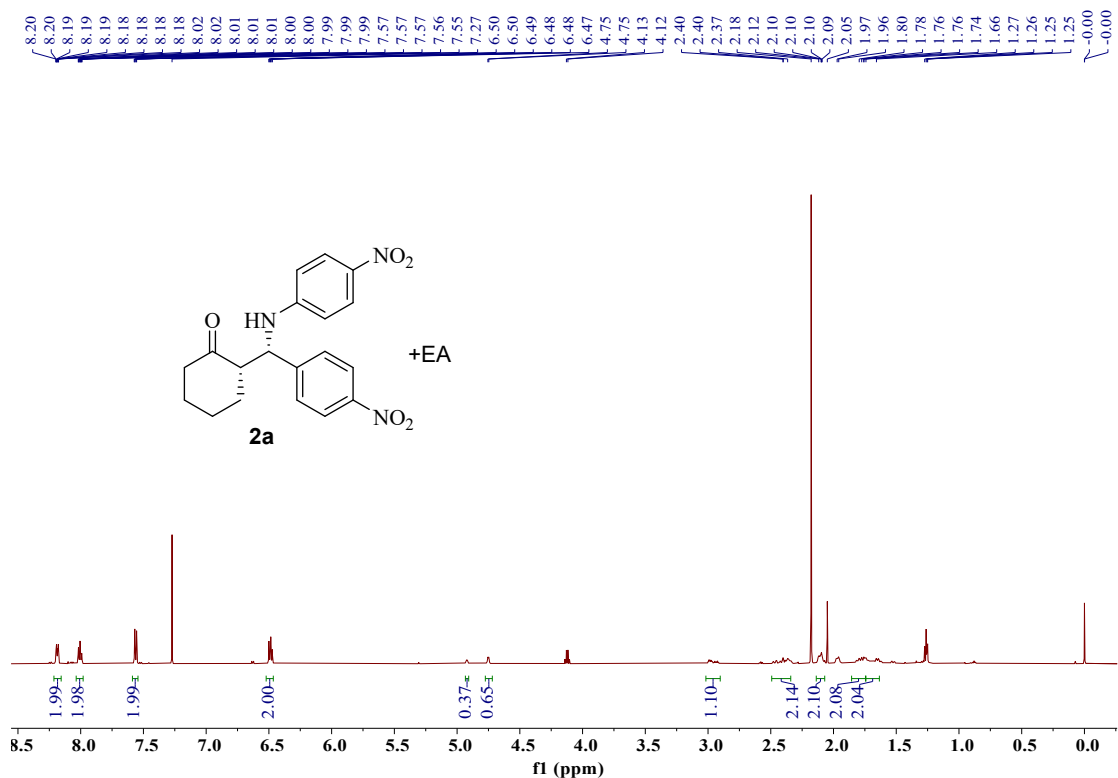

<sup>13</sup>C NMR Spectrum (151 MHz, Chloroform-*d*) of **2a**

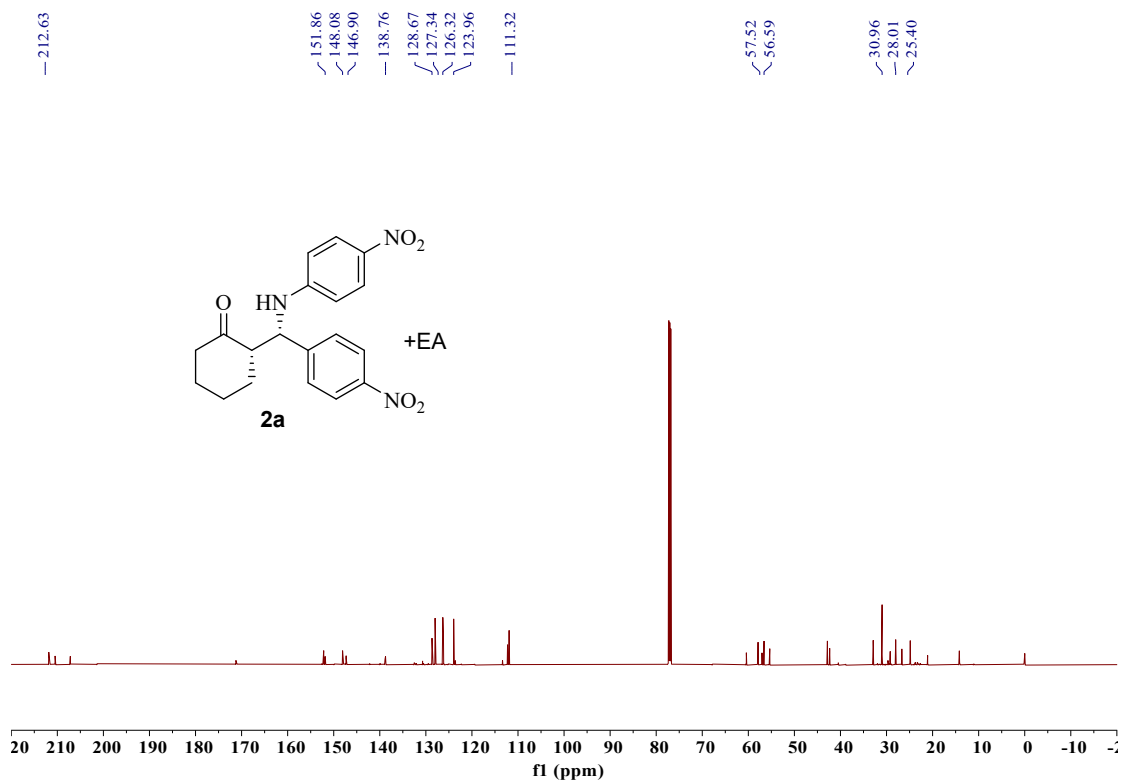

<sup>1</sup>H NMR Spectrum (600 MHz, Chloroform-*d*) of **2b**

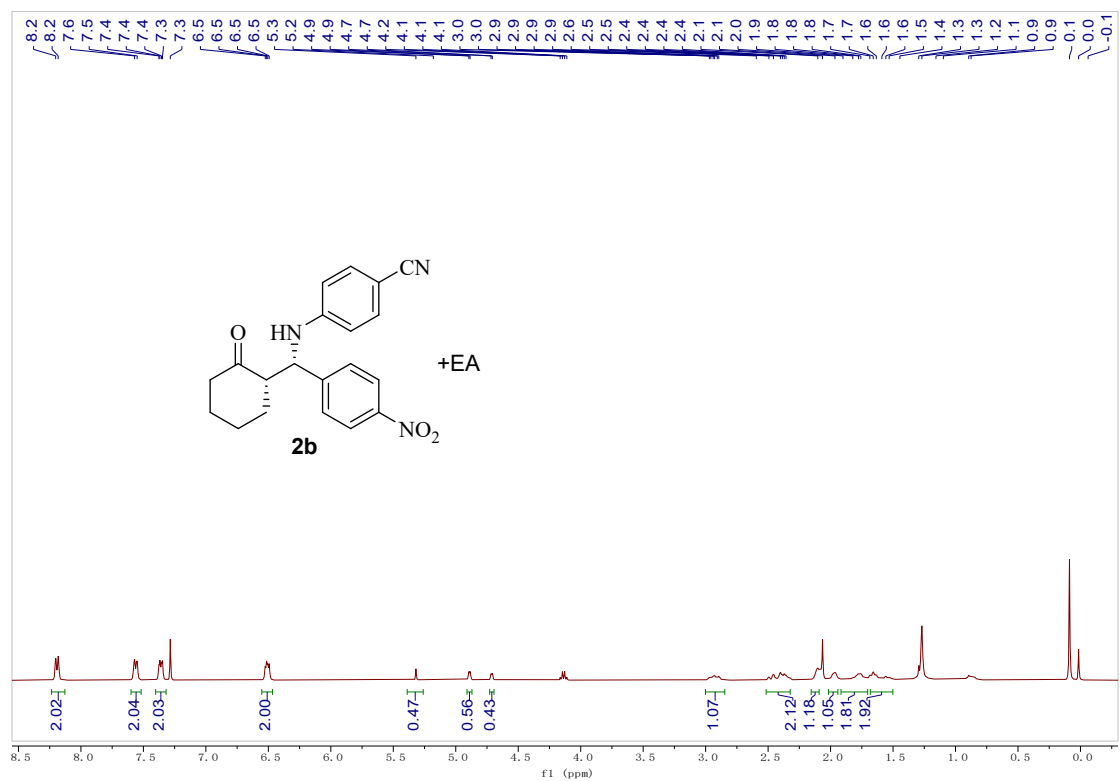

<sup>13</sup>C NMR Spectrum (151 MHz, Chloroform-*d*) of **2b**

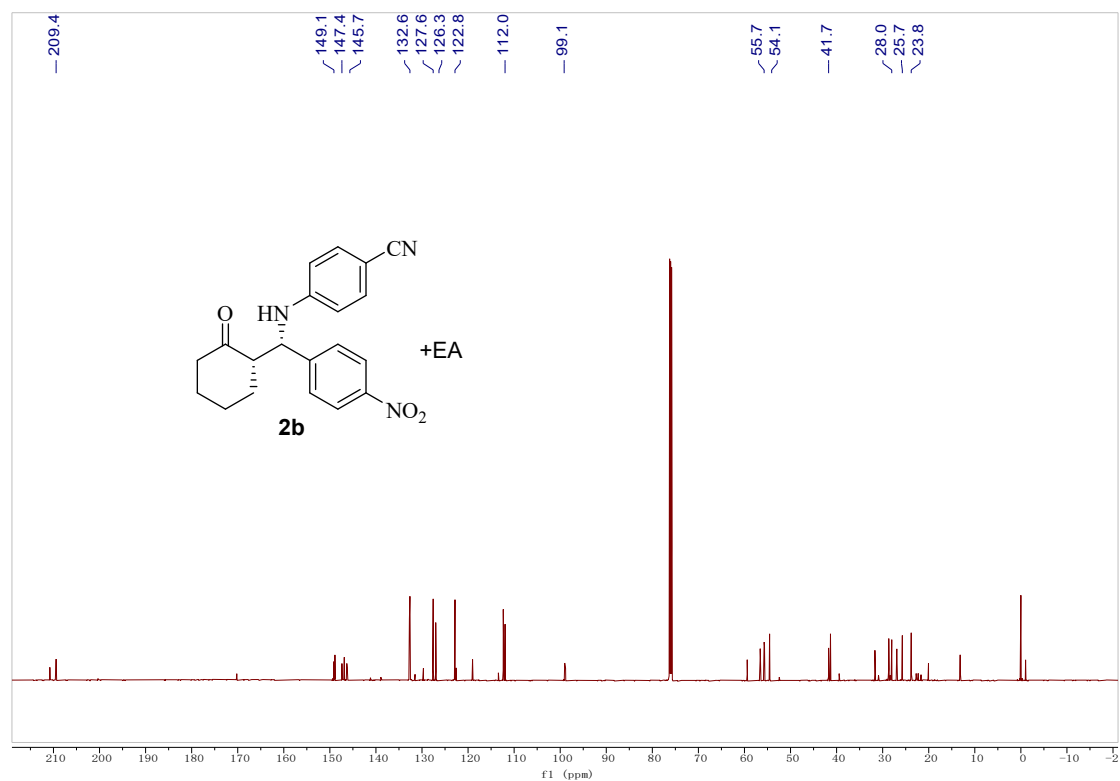

<sup>1</sup>H NMR Spectrum (600 MHz, Chloroform-*d*) of **2c**

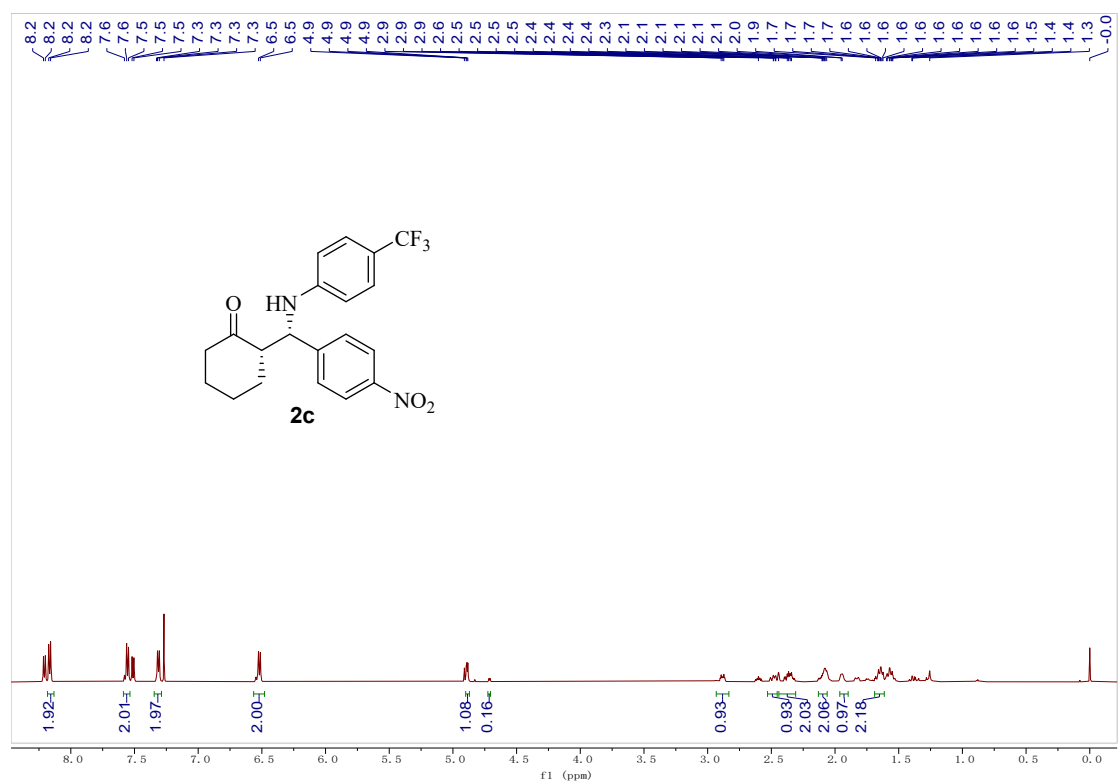

<sup>13</sup>C NMR Spectrum (151 MHz, Chloroform-*d*) of **2c**

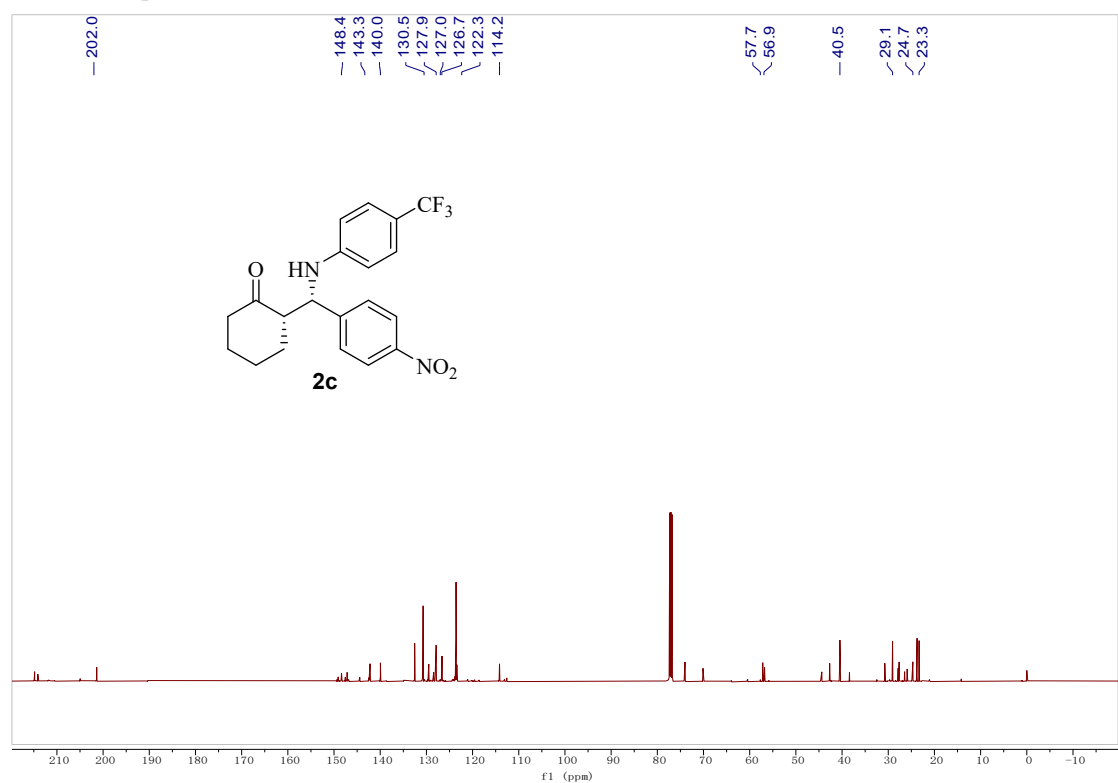

<sup>1</sup>H NMR Spectrum (600 MHz, Chloroform-*d*) of **2d**

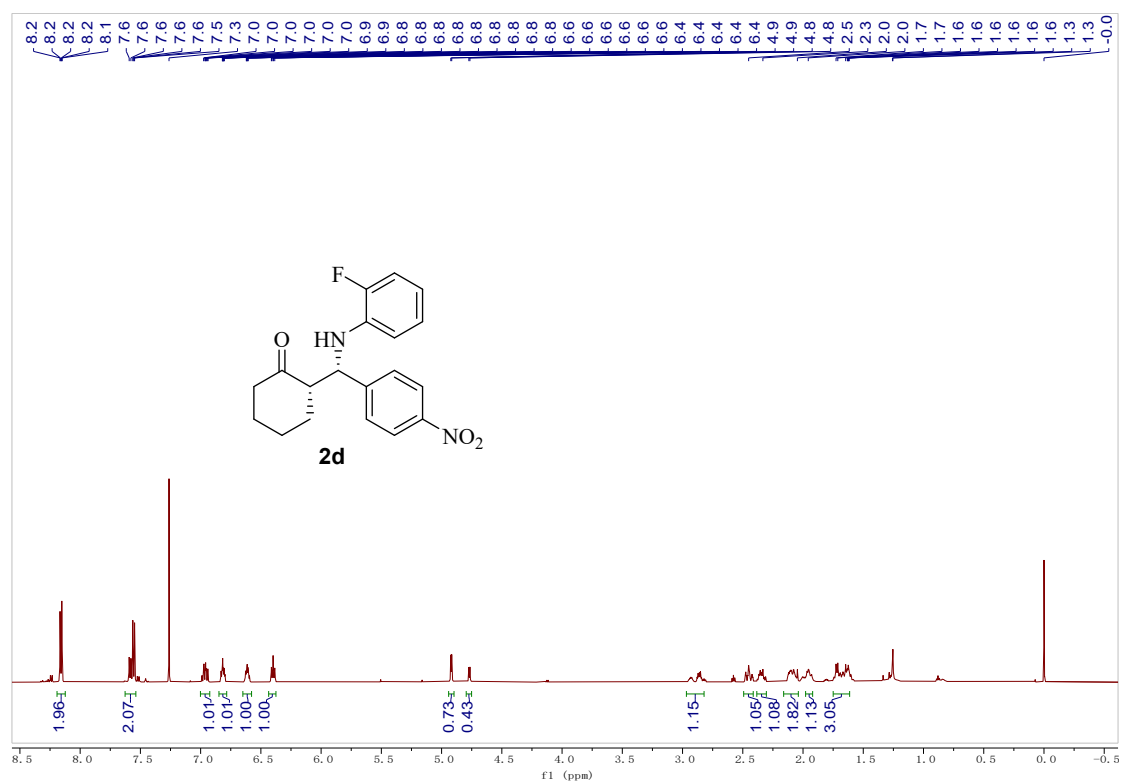

<sup>13</sup>C NMR Spectrum (126 MHz, Chloroform-*d*) of **2d**

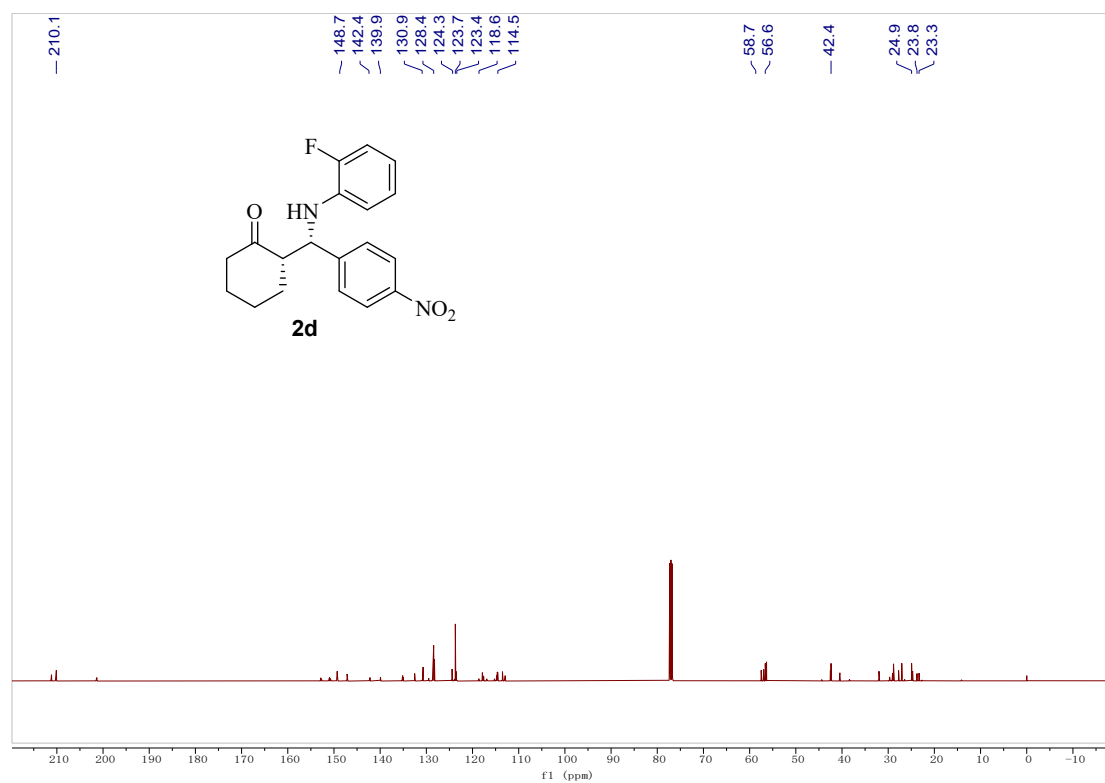

<sup>1</sup>H NMR Spectrum (400 MHz, Chloroform-*d*) of **2e**

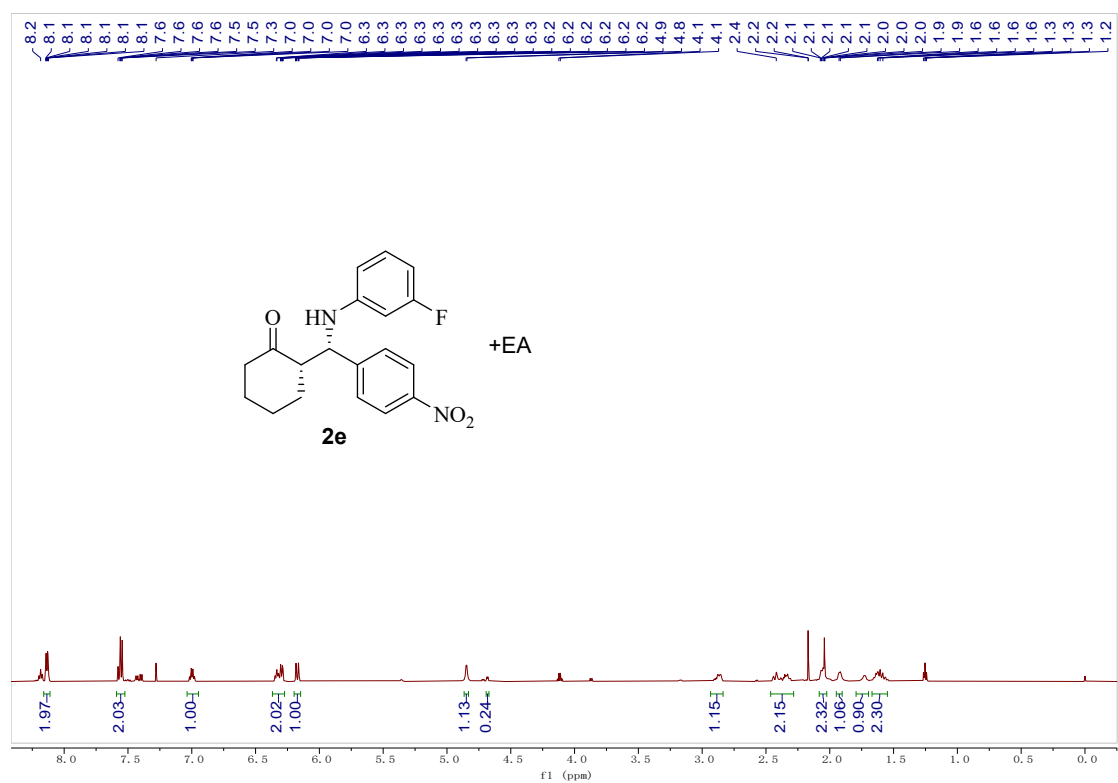

<sup>13</sup>C NMR Spectrum (151 MHz, Chloroform-*d*) of **2e**

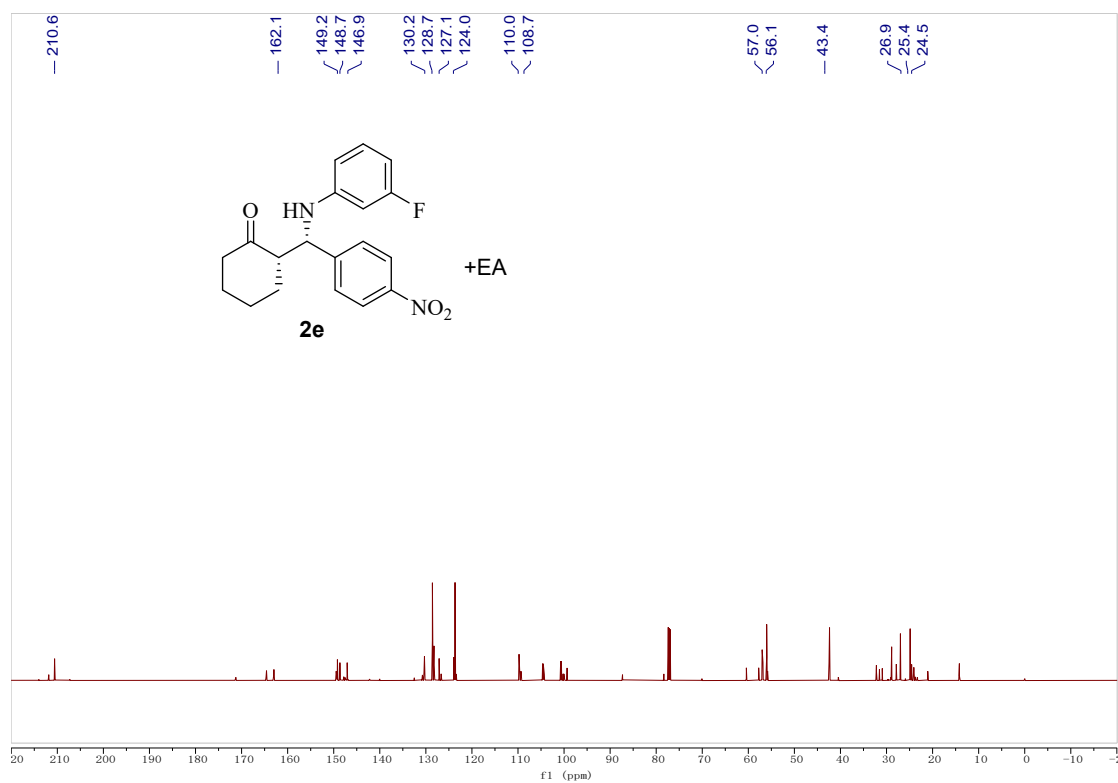

<sup>1</sup>H NMR Spectrum (600 MHz, Chloroform-*d*) of **2f**

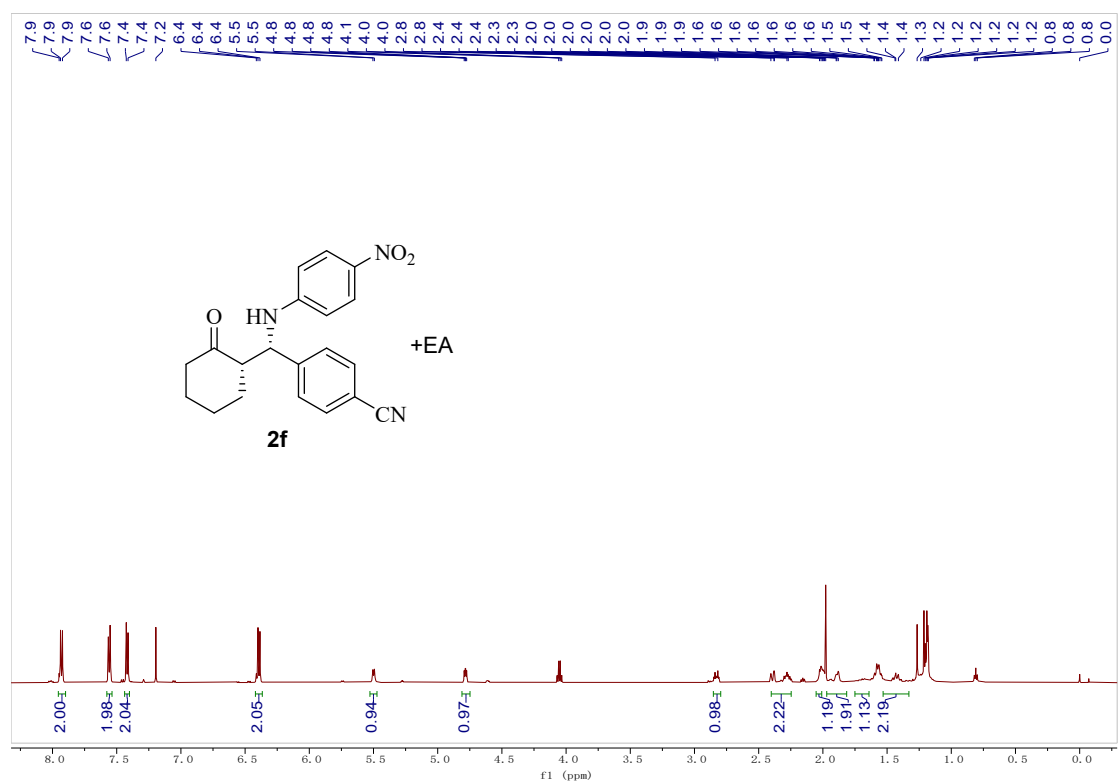

<sup>13</sup>C NMR Spectrum (126 MHz, Chloroform-*d*) of **2f**

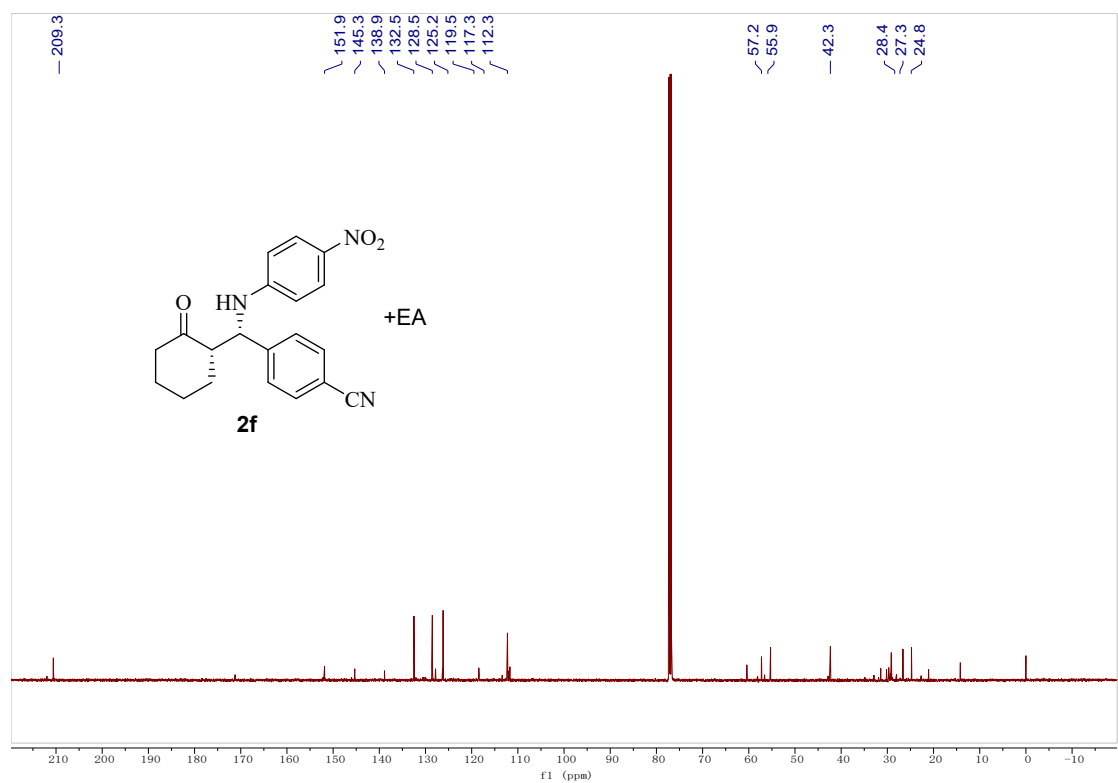

<sup>1</sup>H NMR Spectrum (600 MHz, Chloroform-*d*) of **2g**

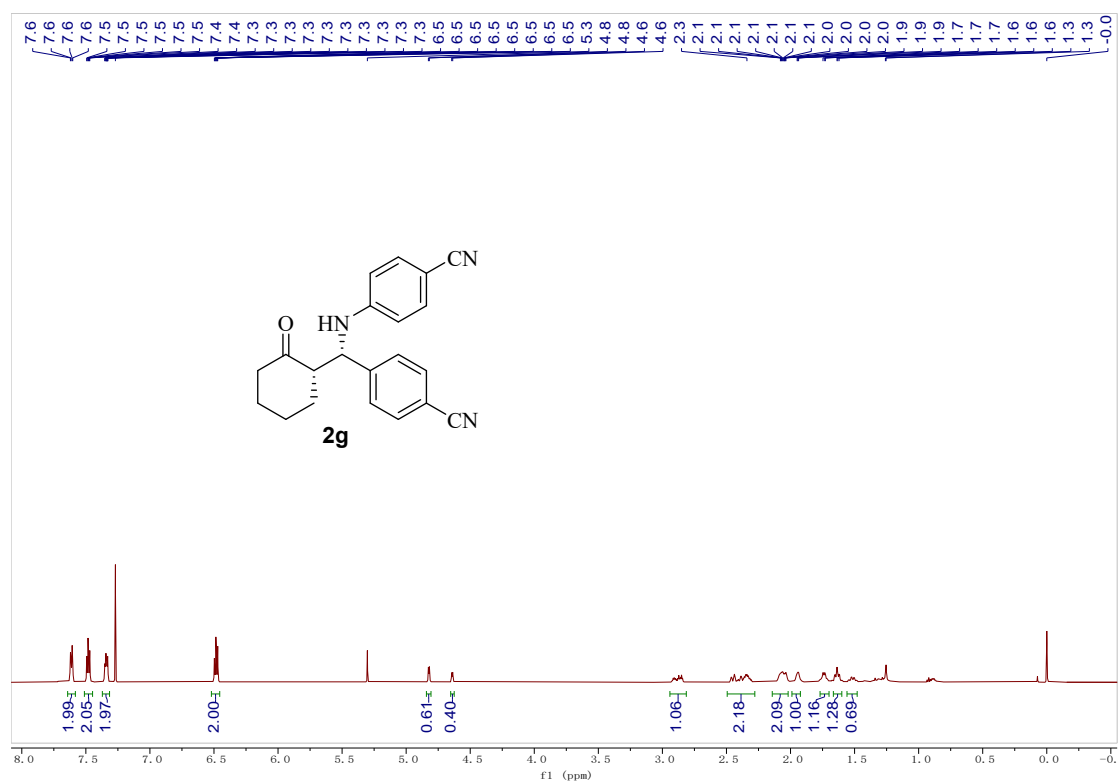

<sup>13</sup>C NMR Spectrum (151 MHz, Chloroform-*d*) of **2g**

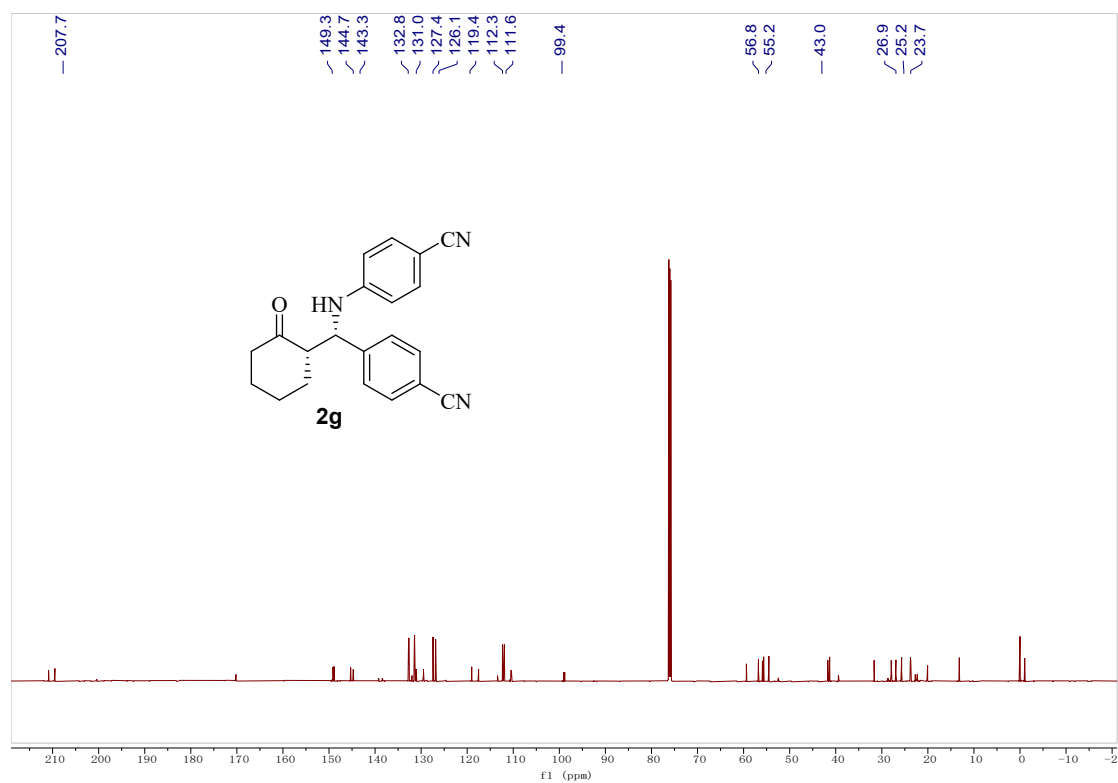



# <sup>1</sup>H NMR Spectrum (600 MHz, Chloroform-*d*) of **2h**

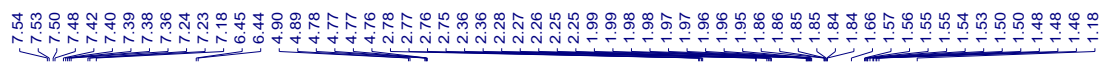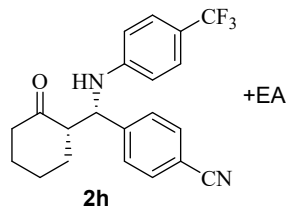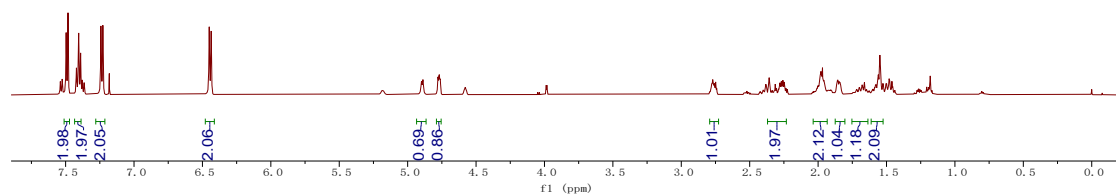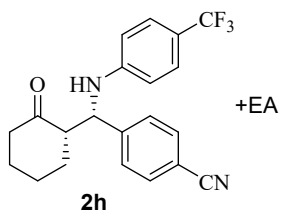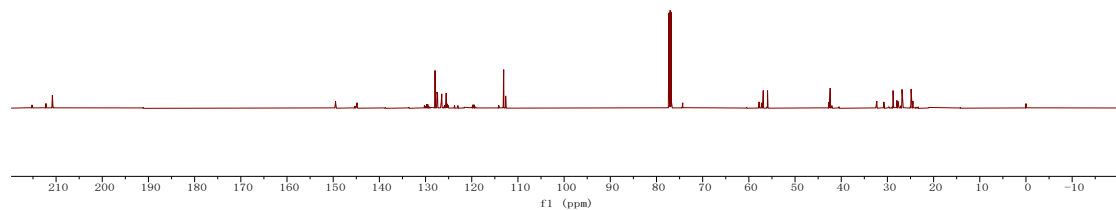

# <sup>1</sup>H NMR Spectrum (600 MHz, Chloroform-*d*) of **2i**

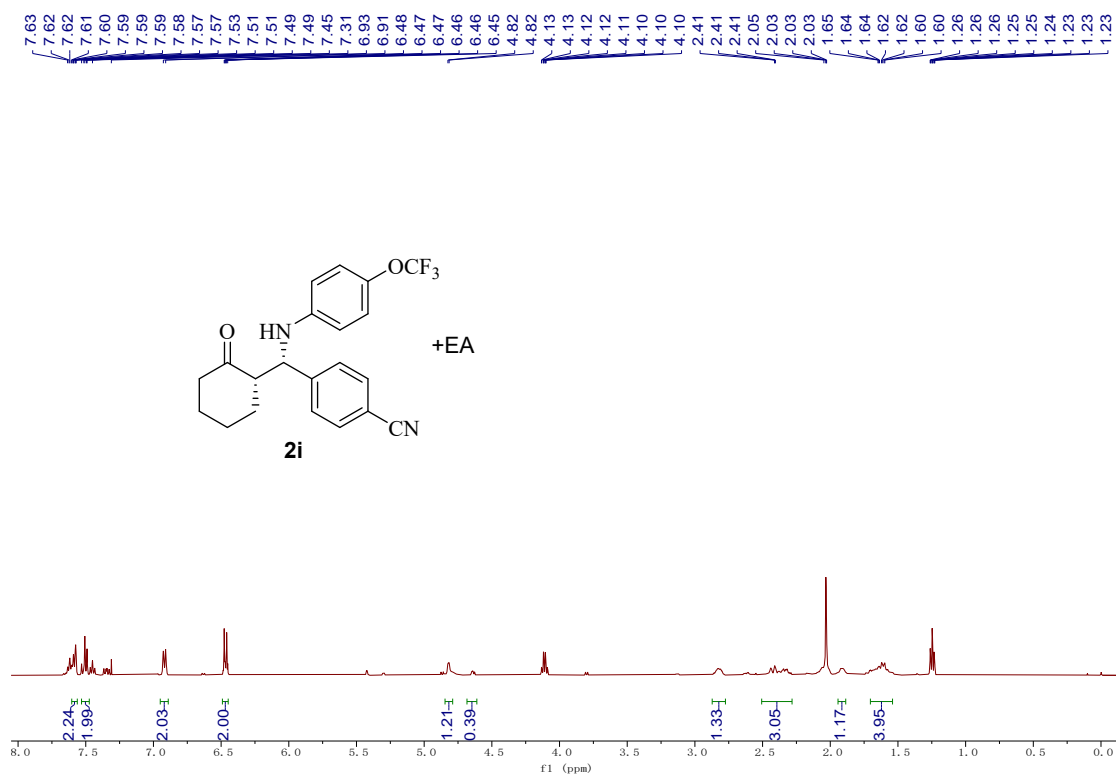

# <sup>13</sup>C NMR Spectrum (126 MHz, Chloroform-*d*) of **2i**

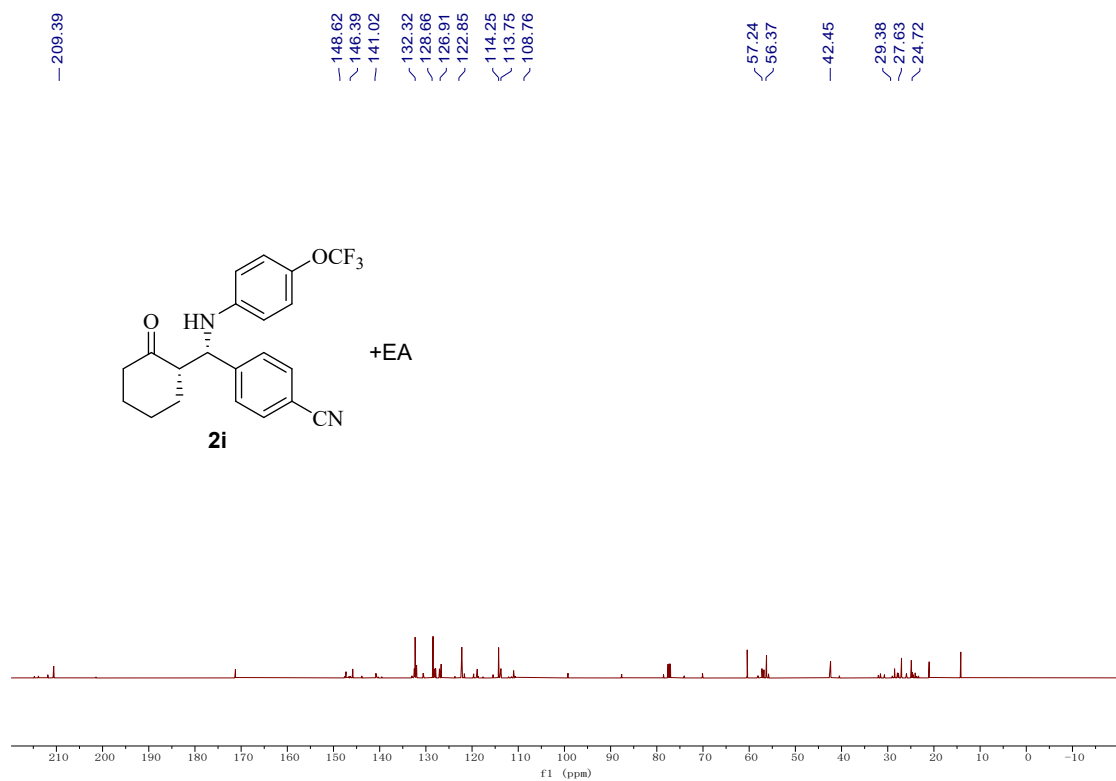

<sup>1</sup>H NMR Spectrum (600 MHz, Chloroform-*d*) of **2j**

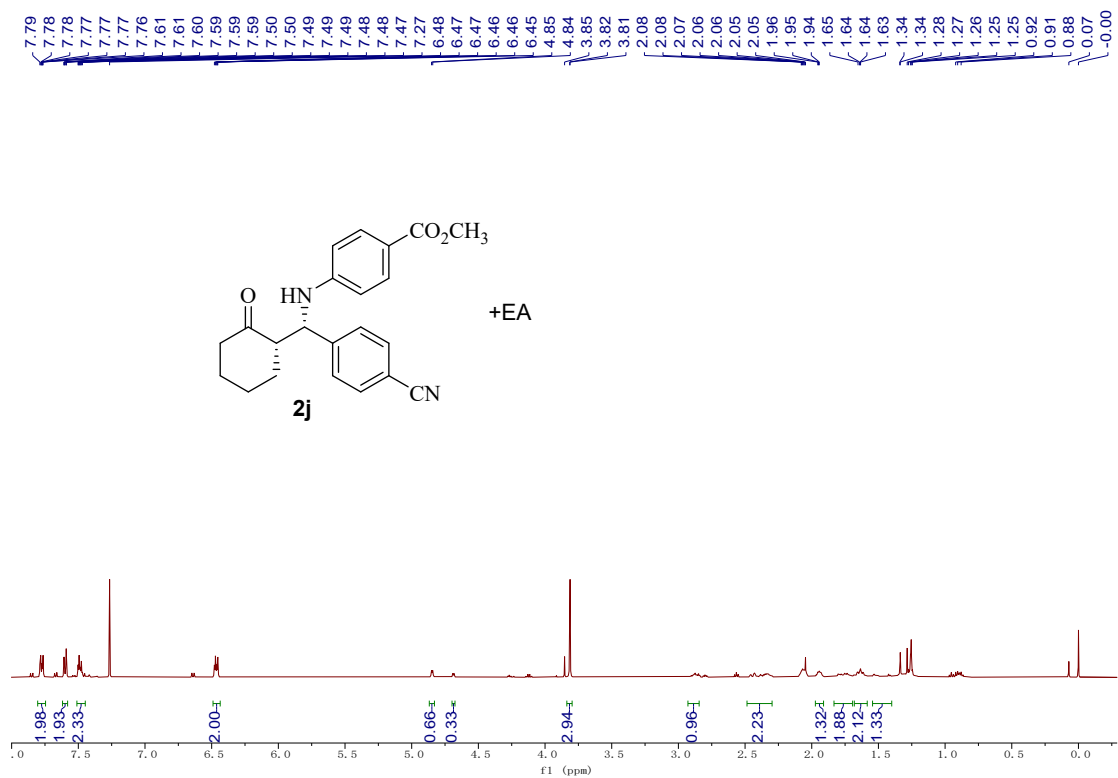

<sup>13</sup>C NMR Spectrum (151 MHz, Chloroform-*d*) of **2j**

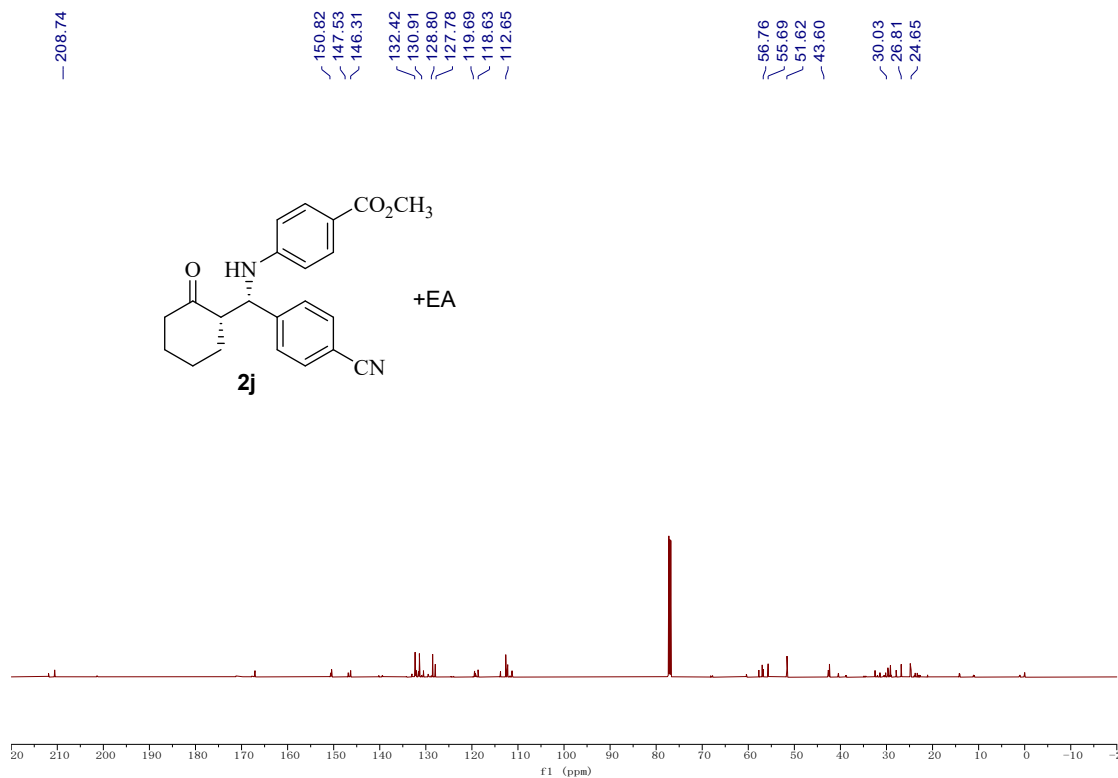

<sup>1</sup>H NMR Spectrum (600 MHz, Chloroform-*d*) of **2k**

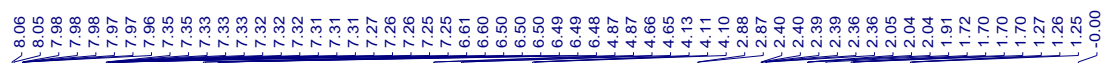

<sup>13</sup>C NMR Spectrum (151 MHz, Chloroform-*d*) of **2k**

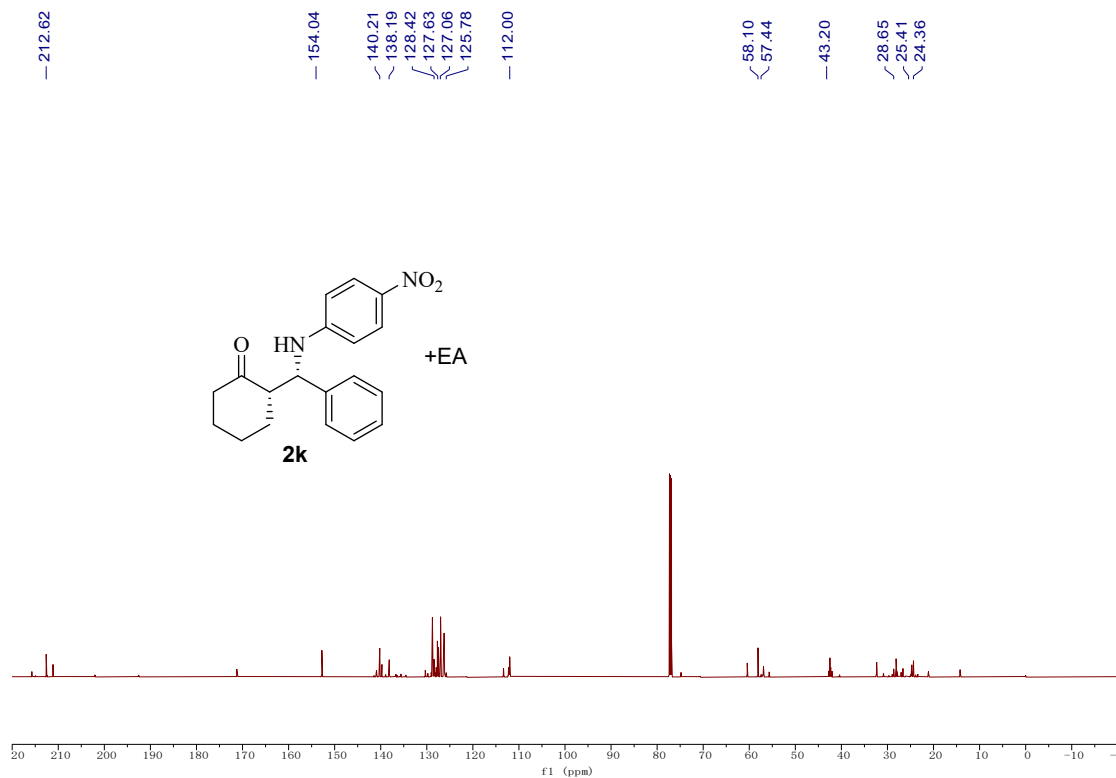

# <sup>1</sup>H NMR Spectrum (600 MHz, Chloroform-*d*) of **21**

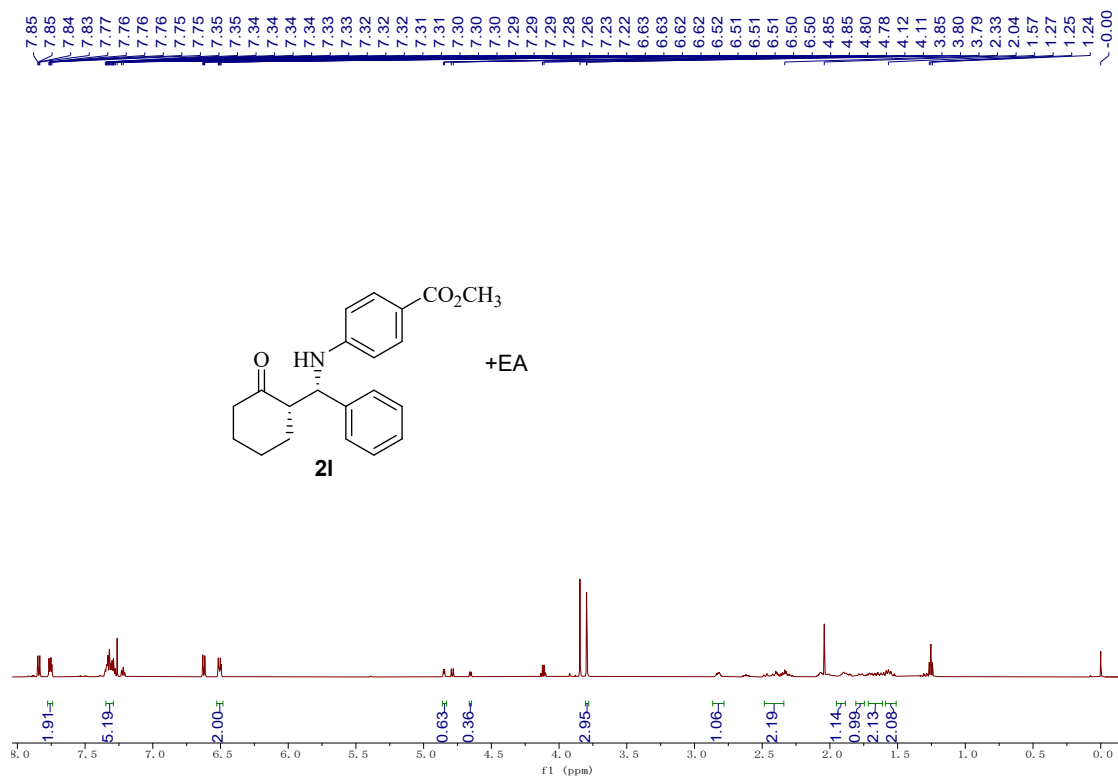

# <sup>13</sup>C NMR Spectrum (151 MHz, Chloroform-*d*) of **21**

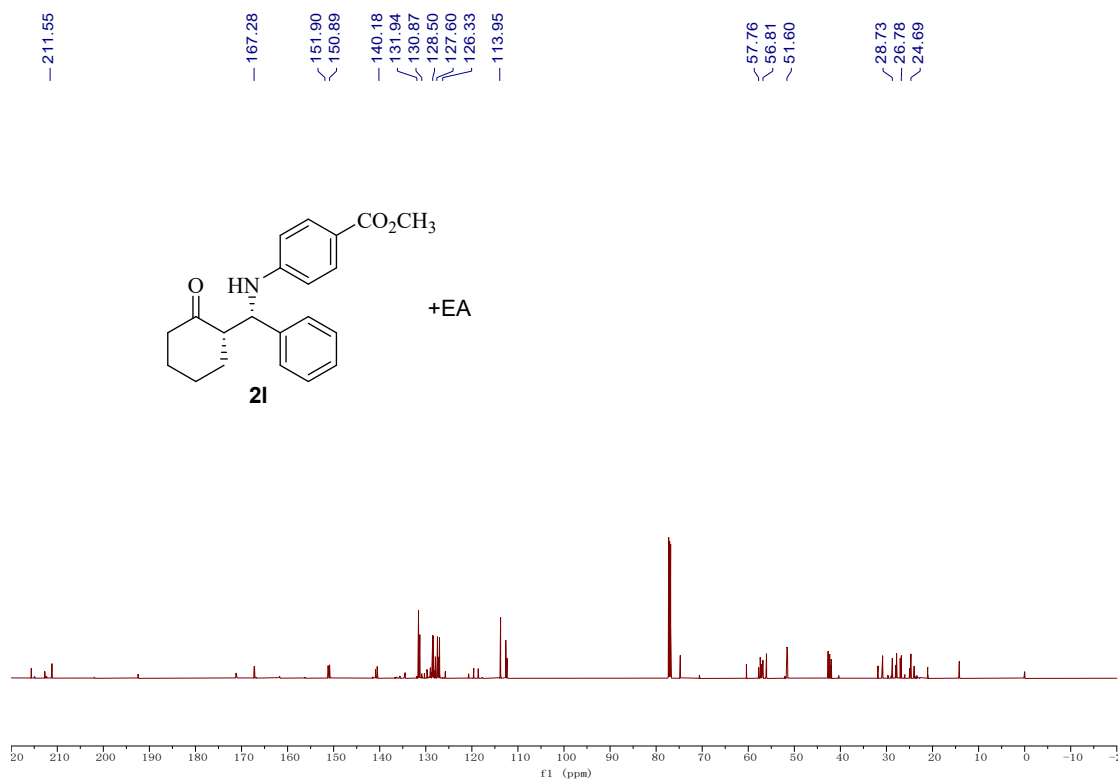

<sup>1</sup>H NMR Spectrum (400 MHz, Chloroform-*d*) of **2m**

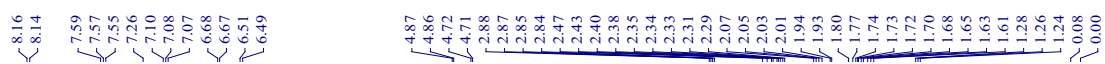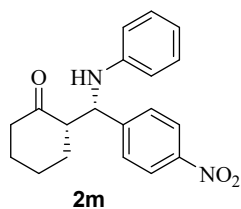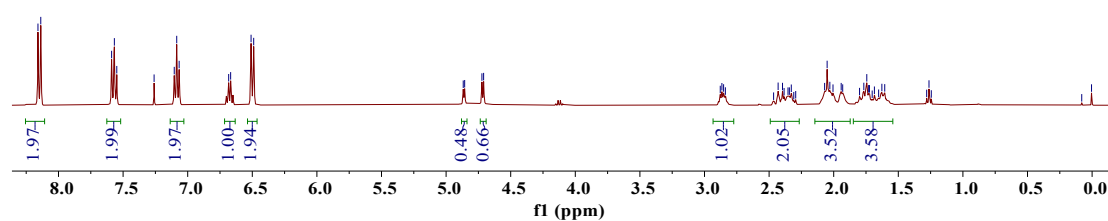

<sup>13</sup>C NMR Spectrum (101 MHz, Chloroform-*d*) of **2m**

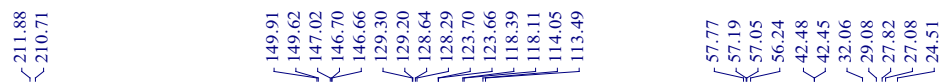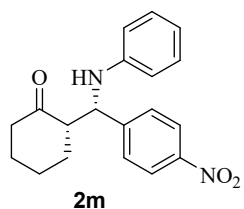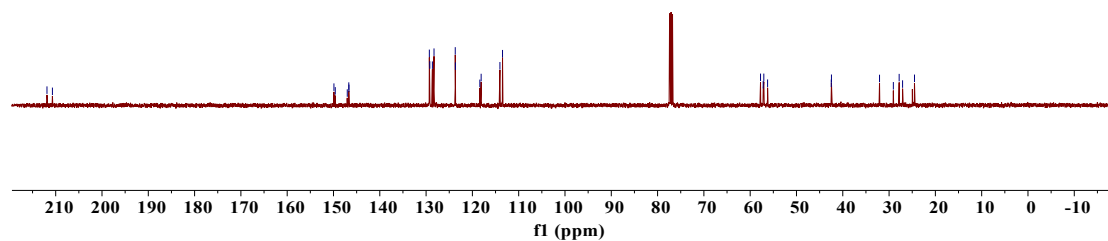

<sup>1</sup>H NMR Spectrum (400 MHz, Chloroform-*d*) of **2n**

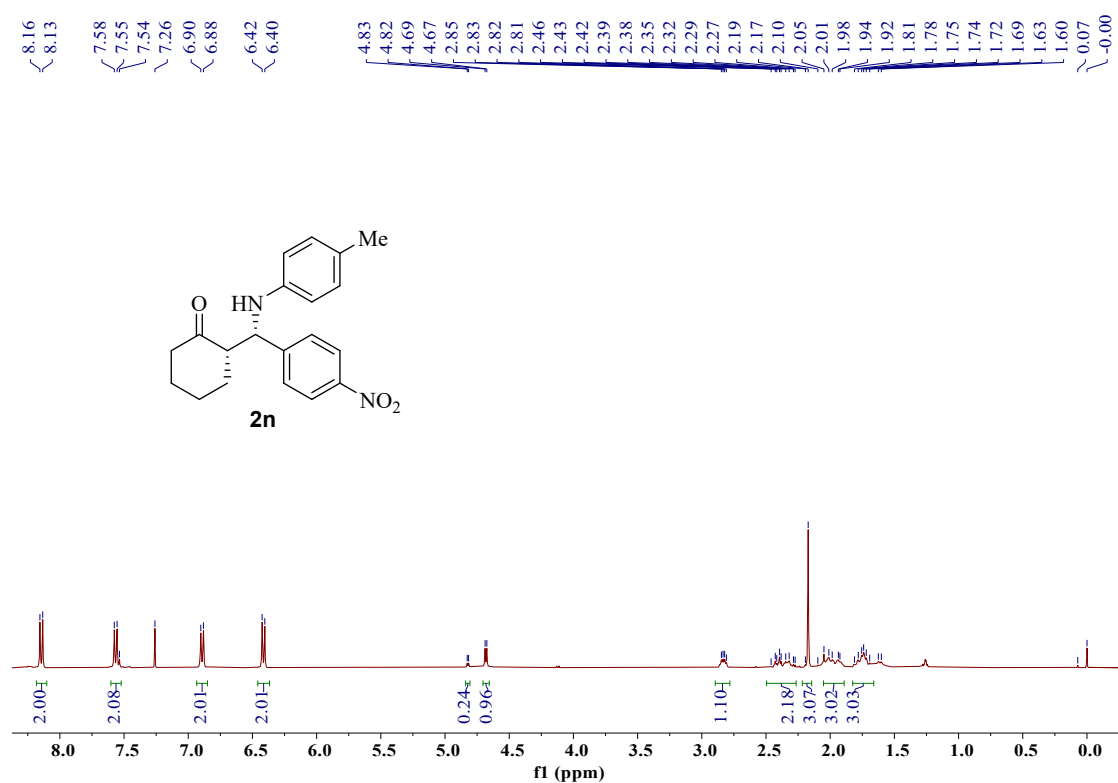

<sup>13</sup>C NMR Spectrum (101 MHz, Chloroform-*d*) of **2n**

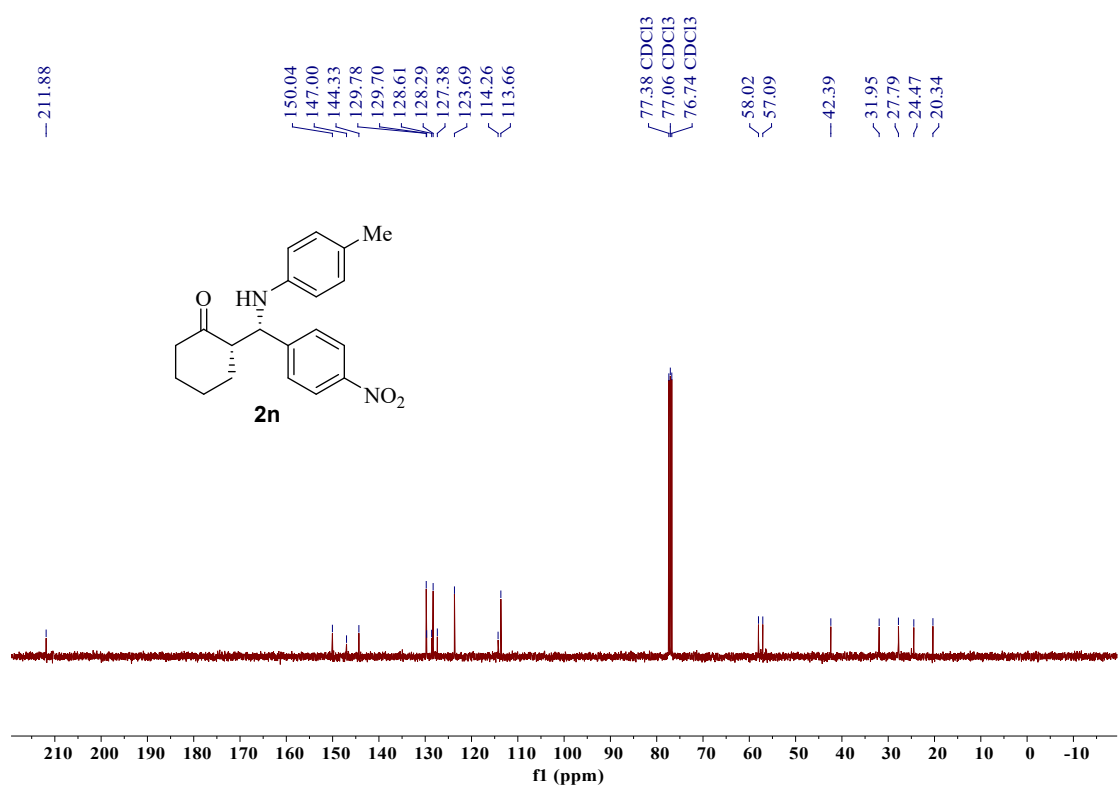

<sup>1</sup>H NMR Spectrum (400 MHz, Chloroform-*d*) of **2o**

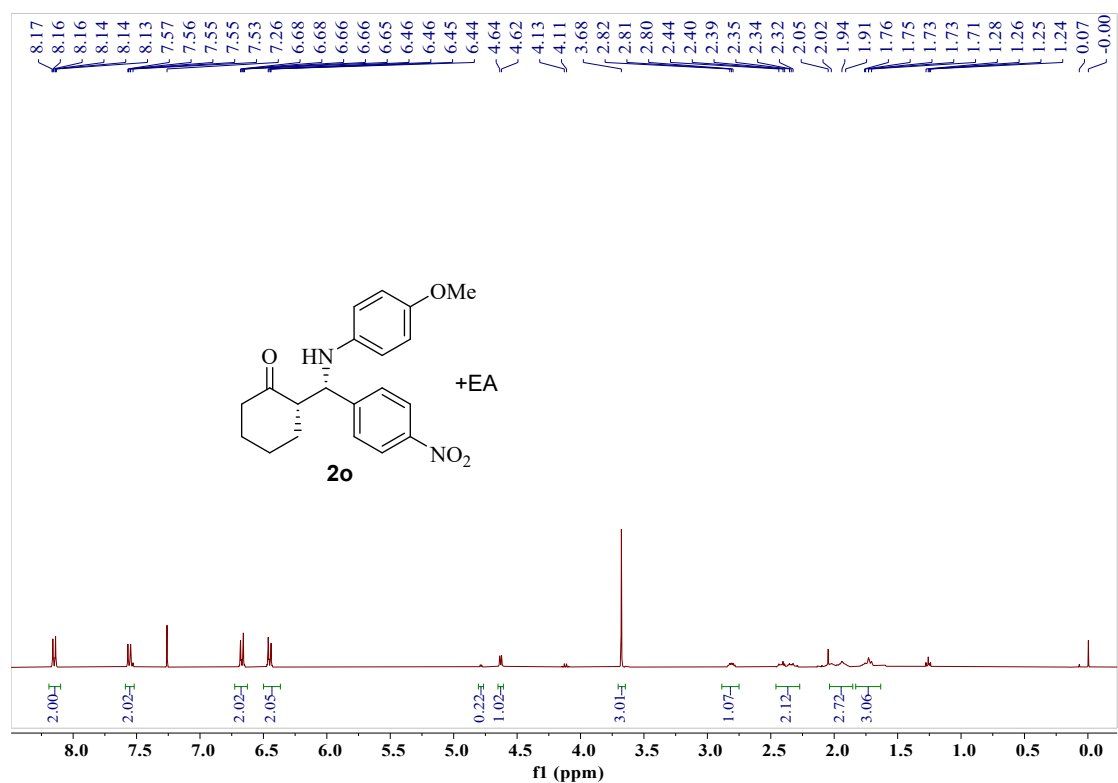

<sup>13</sup>C NMR Spectrum (101 MHz, Chloroform-*d*) of **2o**

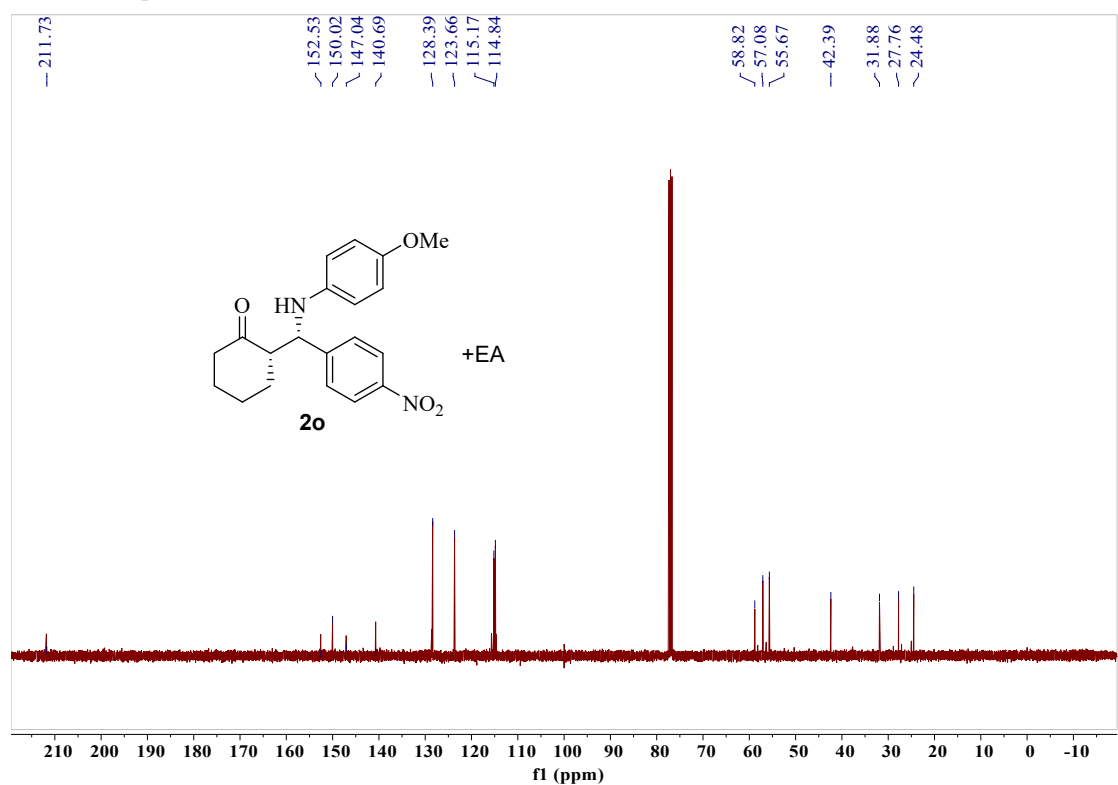



### <sup>1</sup>H NMR Spectrum (600 MHz, Chloroform-*d*) of **2p**

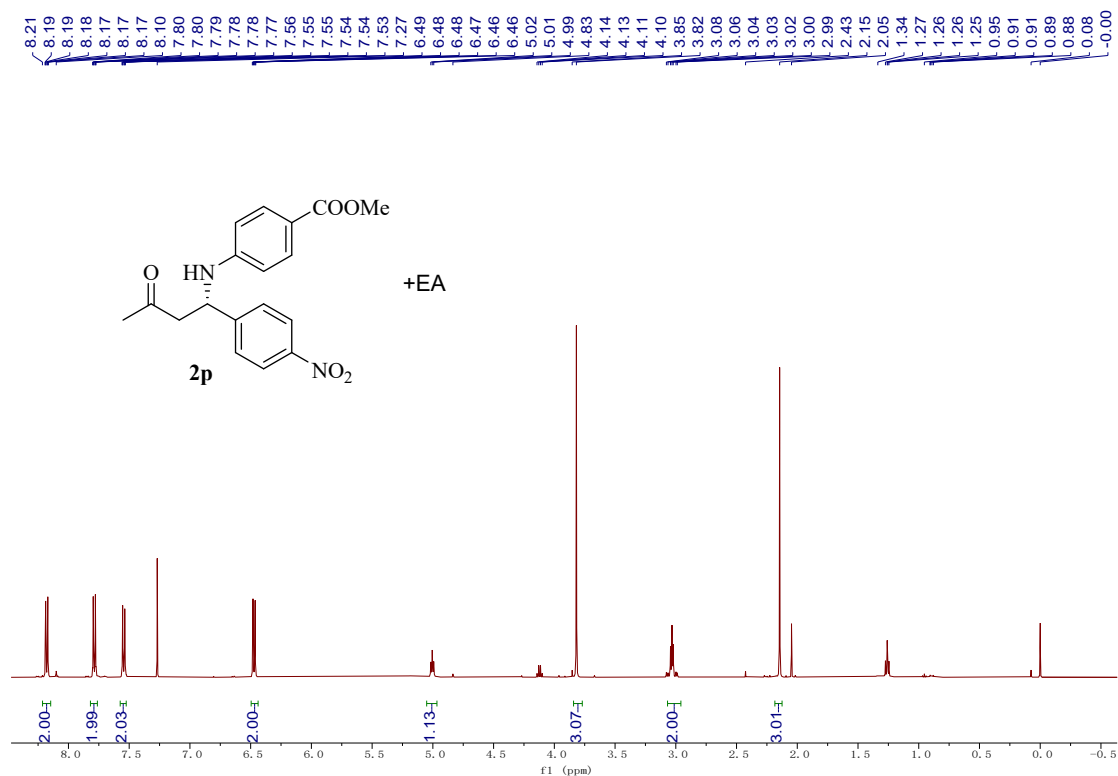

### <sup>13</sup>C NMR Spectrum (126 MHz, Chloroform-*d*) of **2p**

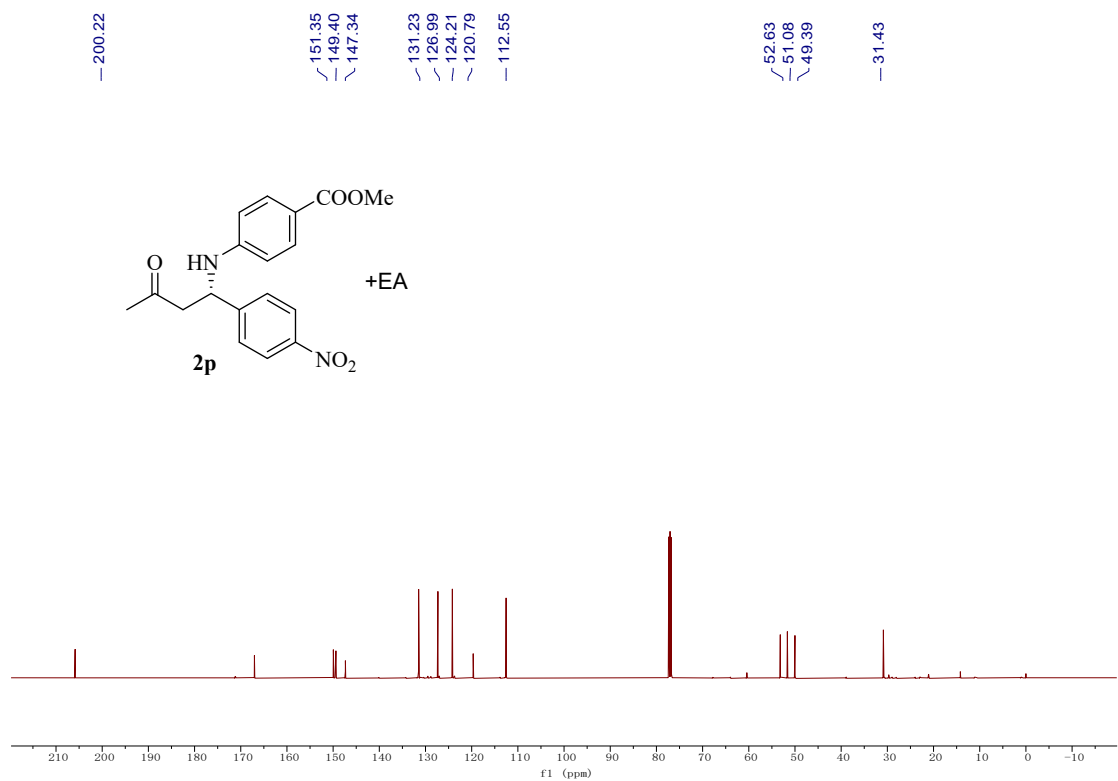

<sup>1</sup>H NMR Spectrum (500 MHz, Chloroform-*d*) of **2q**

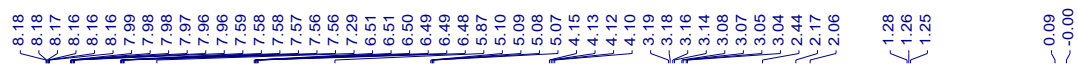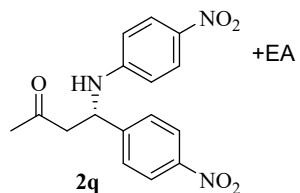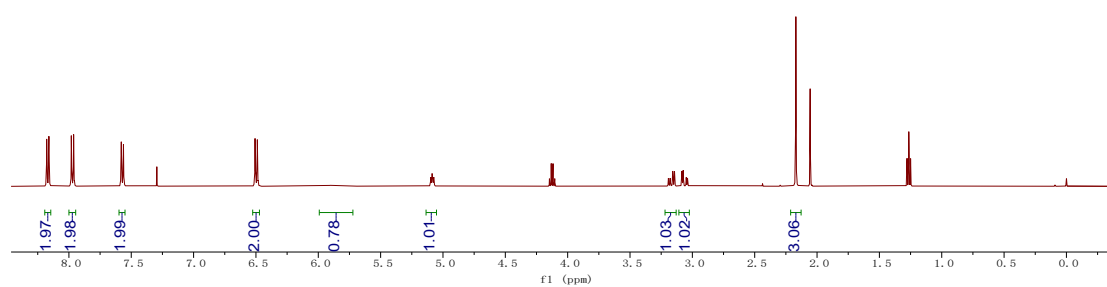

<sup>13</sup>C NMR Spectrum (126 MHz, Chloroform-*d*) of **2q**

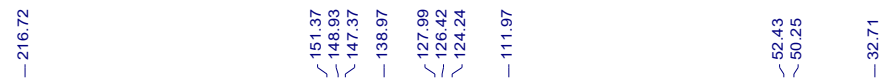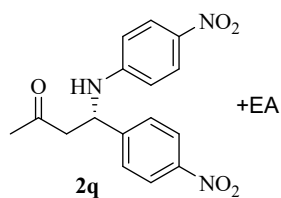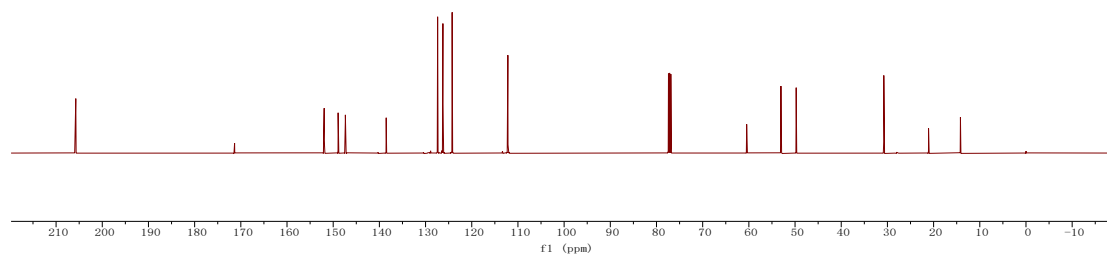

<sup>1</sup>H NMR Spectrum (500 MHz, Chloroform-*d*) of **2r**

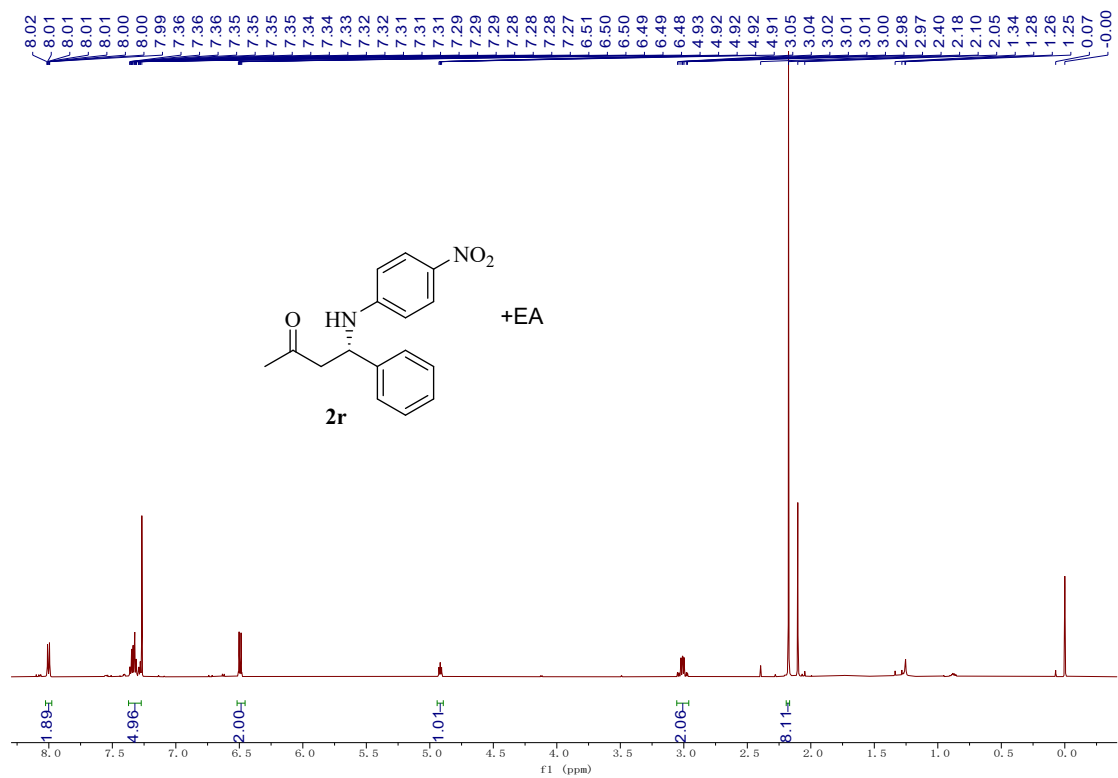

<sup>13</sup>C NMR Spectrum (126 MHz, Chloroform-*d*) of **2r**

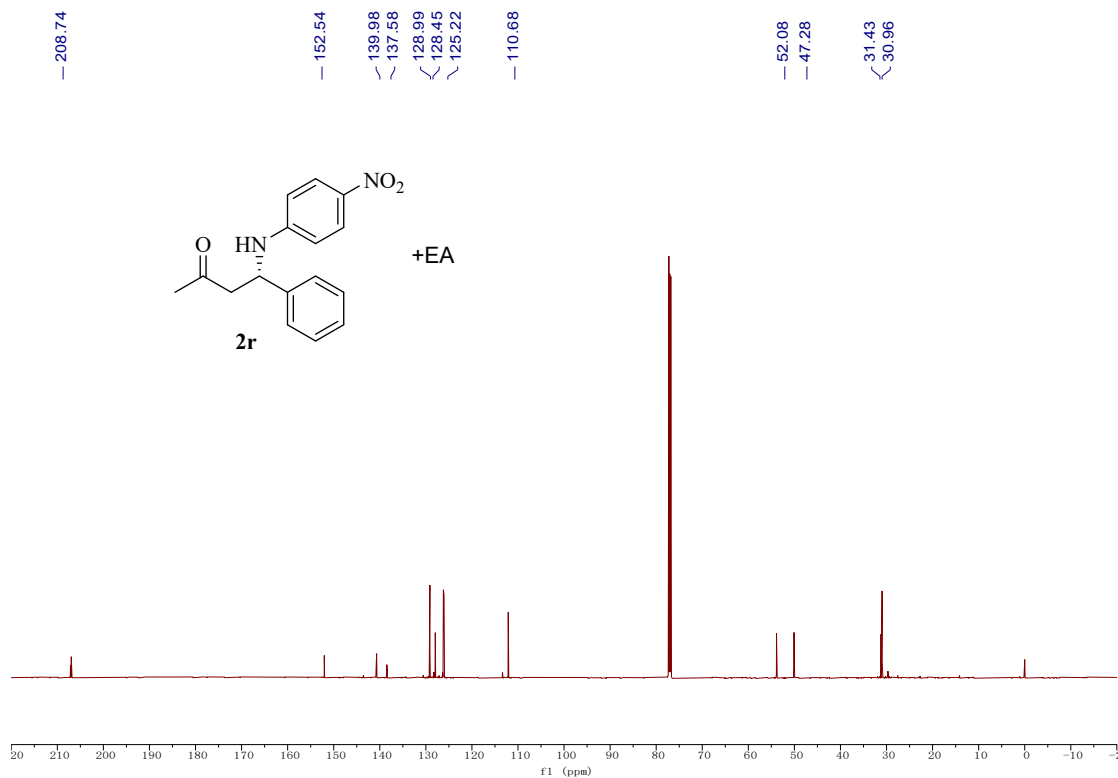

<sup>1</sup>H NMR Spectrum (500 MHz, Chloroform-*d*) of **2s**

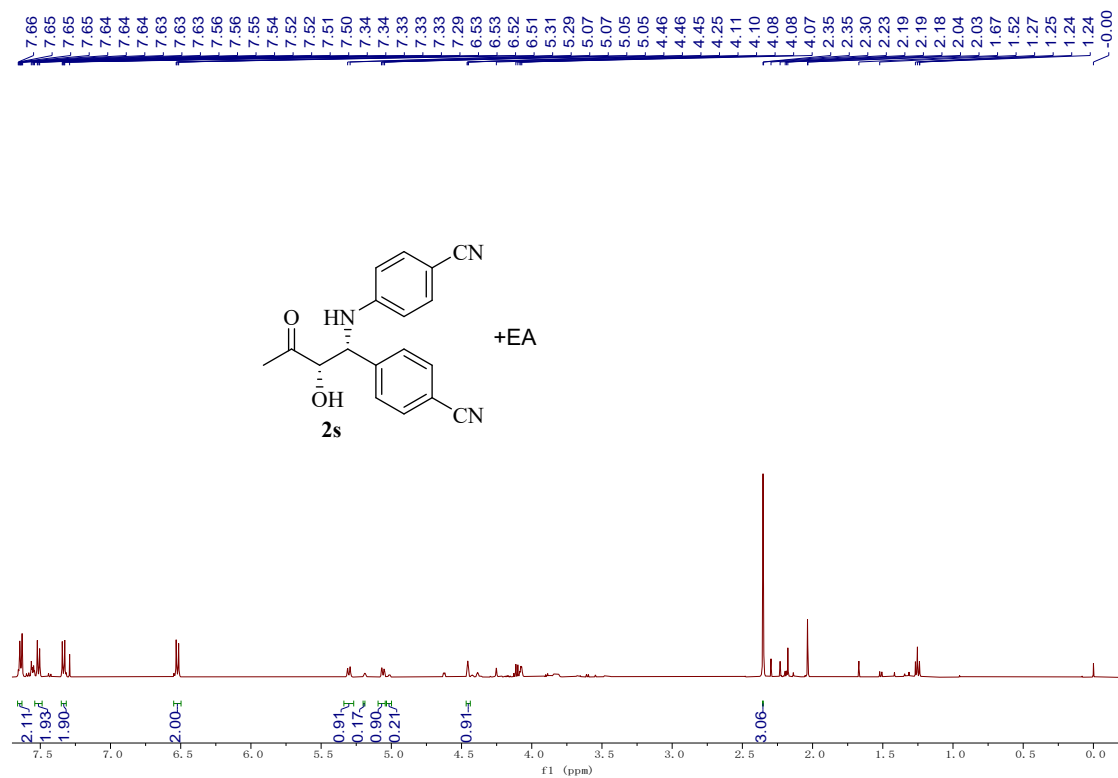

<sup>13</sup>C NMR Spectrum (126 MHz, Chloroform-*d*) of **2s**

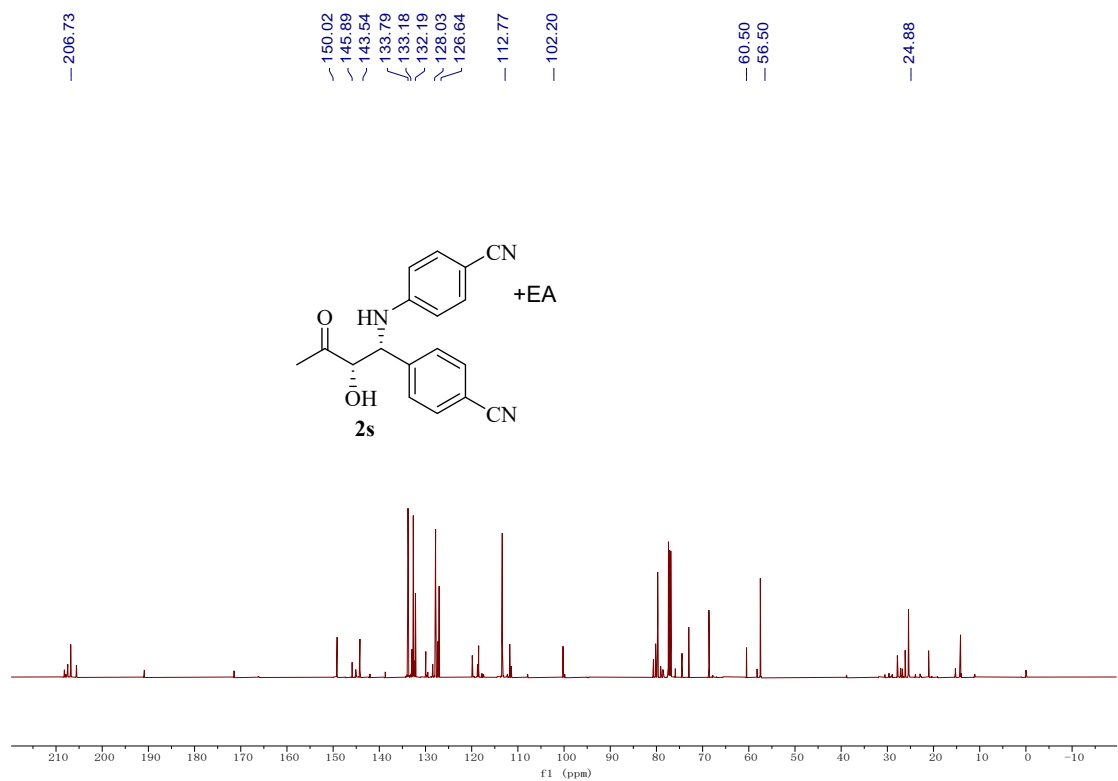

<sup>1</sup>H NMR Spectrum (500 MHz, Chloroform-*d*) of **2t**

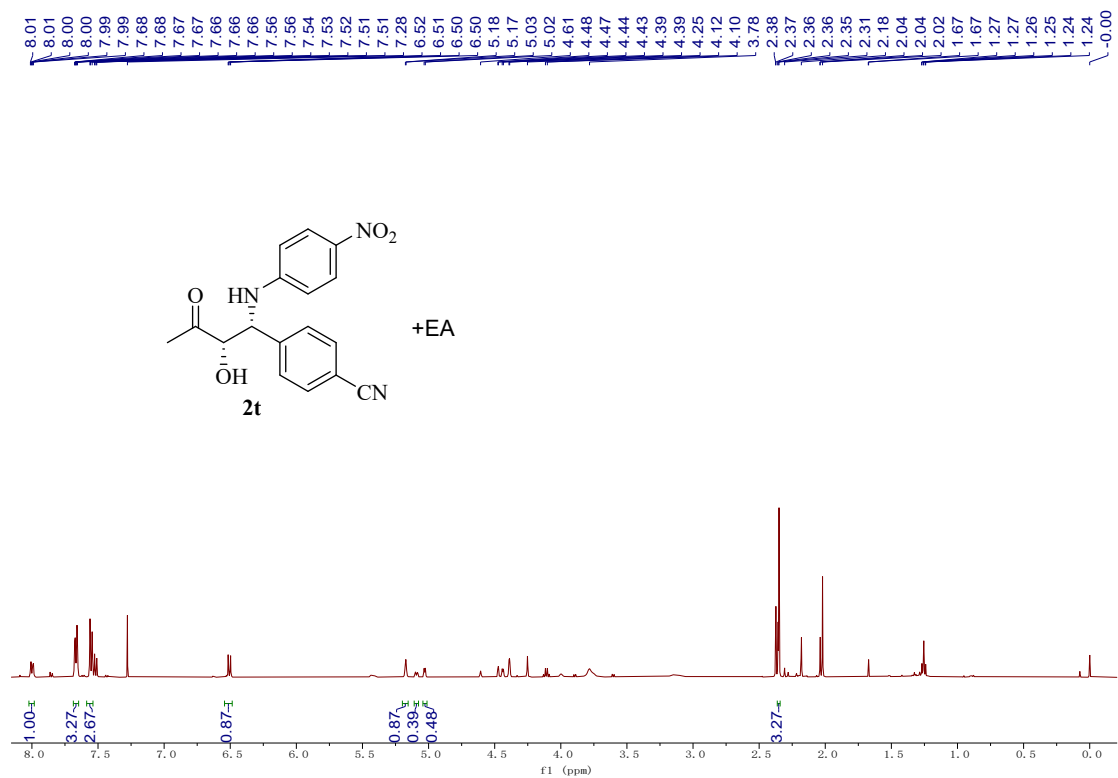

<sup>13</sup>C NMR Spectrum (151 MHz, Chloroform-*d*) of **2t**

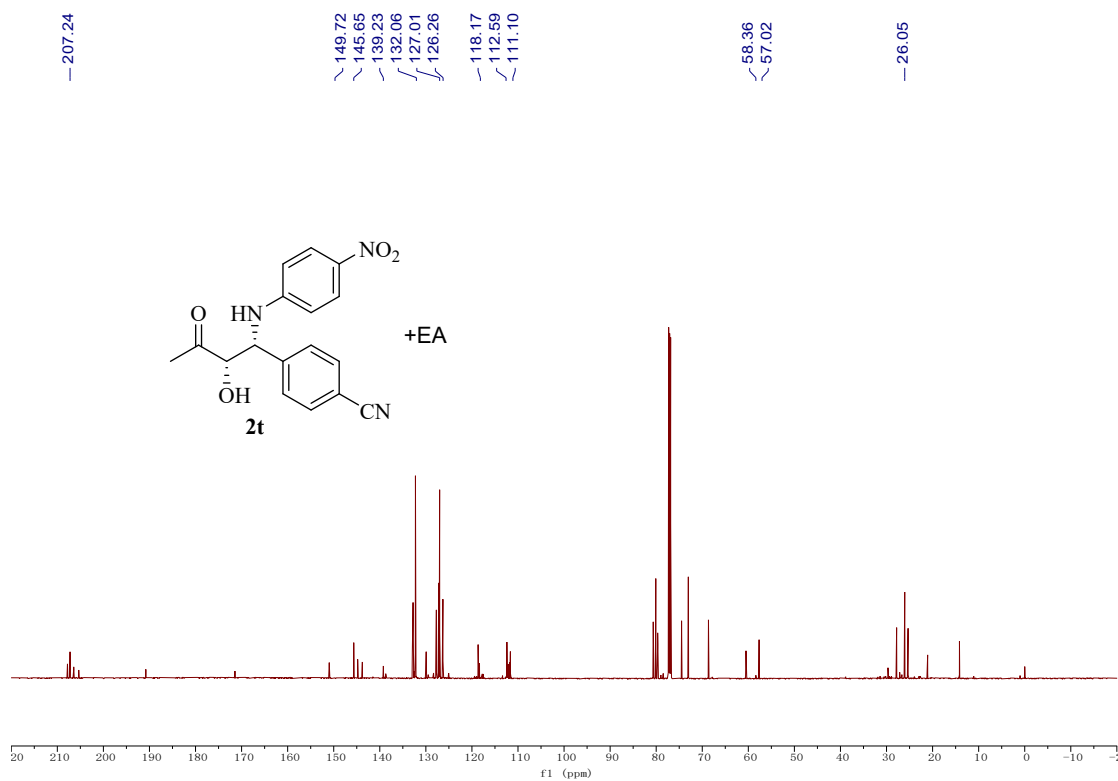

<sup>1</sup>H NMR Spectrum (500 MHz, Chloroform-*d*) of **2u**

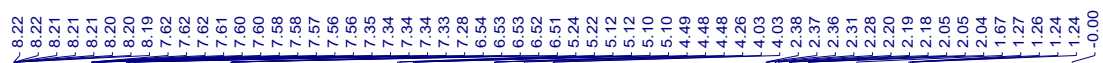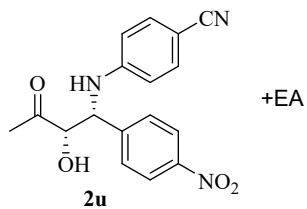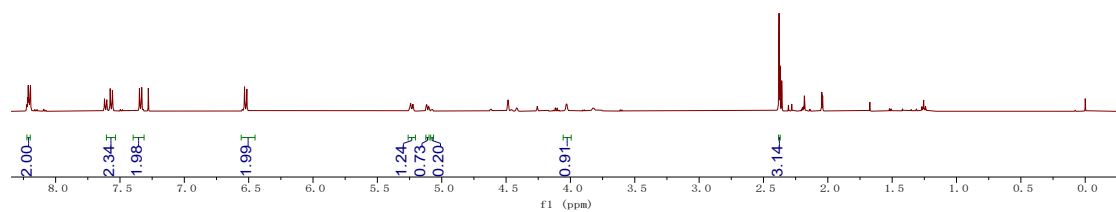

<sup>13</sup>C NMR Spectrum (126 MHz, Chloroform-*d*) of **2u**

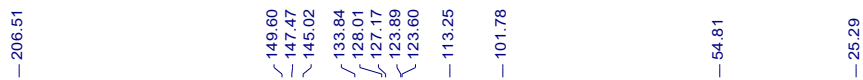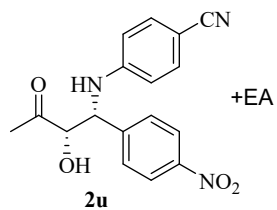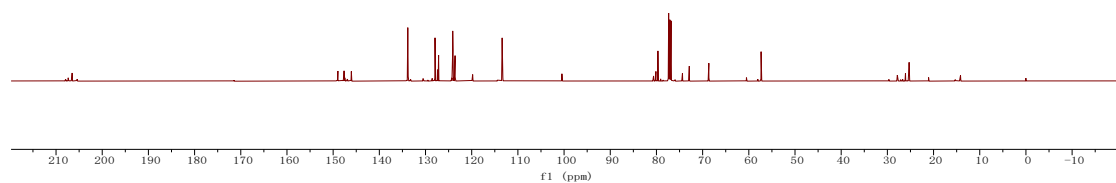

## II HPLC spectra

SHIMADZU  
LabSolutions Analysis

Sample Information

Sample Name: LK-M  
 Sample Type : Unknow  
 Method Name : Mannich  
 Batch Name : 20190104.lcb  
 sample number :  
 Injection Volume : 10 uL  
 Acquisition Date : 2019/4/12 21:53:42 Operator : System Administrator  
 Modified Date : 2019/12/15 23:07:31 Modifield by : WC

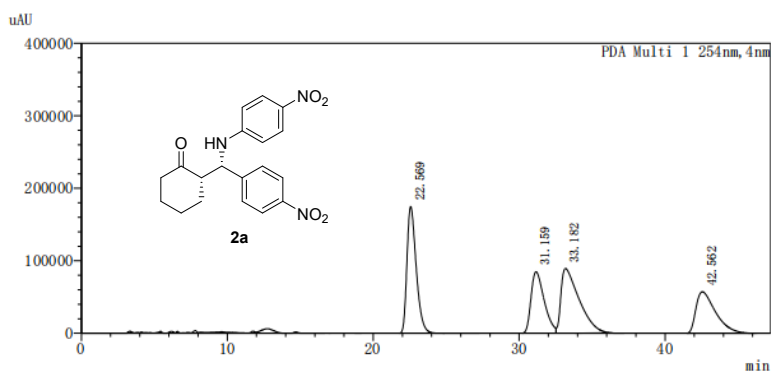

PDA Ch1 254nm

|   | RT(min) | Area    | Height | Area (%) | Height (%) |
|---|---------|---------|--------|----------|------------|
| 1 | 22.569  | 7747032 | 175241 | 29.555   | 43.016     |
| 2 | 31.159  | 5382204 | 85333  | 20.533   | 20.946     |
| 3 | 33.182  | 7736449 | 89529  | 29.514   | 21.976     |
| 4 | 42.562  | 5346922 | 57285  | 20.398   | 14.062     |

SHIMADZU  
LabSolutions Analysis

Sample Information

Sample Name: LK-M-125-24  
 Sample Type : Unknow  
 Method Name : Mannich  
 Batch Name : 迈克加成.lcb  
 sample number :  
 Injection Volume : 10 uL  
 Acquisition Date : 2022/11/25 12:46:52 Operator : System Administrator  
 Modified Date : 2022/11/25 13:34:52 Modifield by : WC

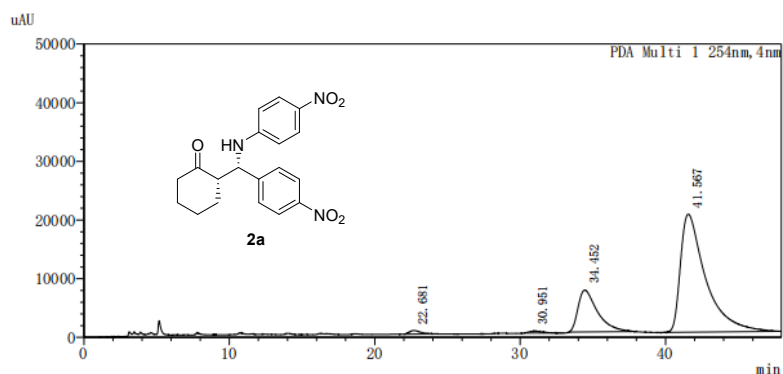

PDA Ch1 254nm

|   | RT(min) | Area    | Height | Area (%) | Height (%) |
|---|---------|---------|--------|----------|------------|
| 1 | 22.681  | 33100   | 608    | 1.052    | 2.156      |
| 2 | 30.951  | 22203   | 333    | 0.705    | 1.182      |
| 3 | 34.452  | 661134  | 7130   | 21.004   | 25.289     |
| 4 | 41.567  | 2431218 | 20122  | 77.239   | 71.373     |

Sample Information

Sample Name: LK-M-139-10 rac  
 Sample Type : Unknow  
 Method Name : AD-H-80-20-1ml  
 Batch Name : 1021.lcb  
 sample number :  
 Injection Volume : 10 uL  
 Acquisition Date : 2023/1/10 11:59:51 Operator : System Administrator  
 Modified Date : 2023/1/10 12:34:11 Modifield by : WC

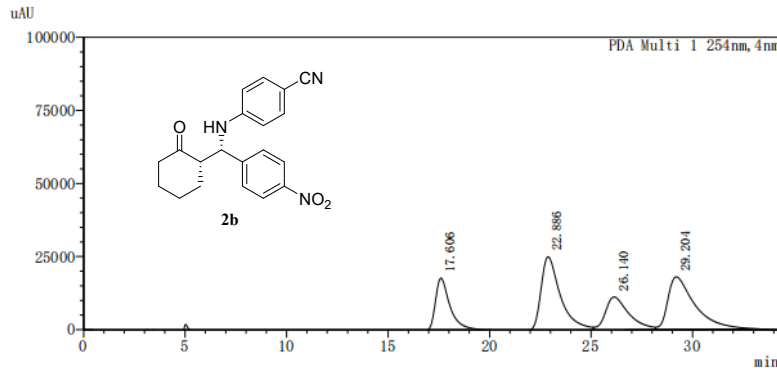

|   | RT(min) | Area    | Height | Area (%) | Height (%) |
|---|---------|---------|--------|----------|------------|
| 1 | 17.606  | 907825  | 18018  | 17.584   | 24.849     |
| 2 | 22.886  | 1681066 | 25207  | 32.560   | 34.762     |
| 3 | 26.140  | 906189  | 11288  | 17.552   | 15.567     |
| 4 | 29.204  | 1667848 | 17999  | 32.304   | 24.822     |

Sample Information

Sample Name: LK-M-139-10  
 Sample Type : Mannich  
 Method Name : AD-H-80-20-1ml  
 Batch Name : 1021.lcb  
 sample number :  
 Injection Volume : 10 uL  
 Acquisition Date : 2023/1/10 16:42:54 Operator : System Administrator  
 Modified Date : 2023/1/10 17:19:32 Modifield by : WC

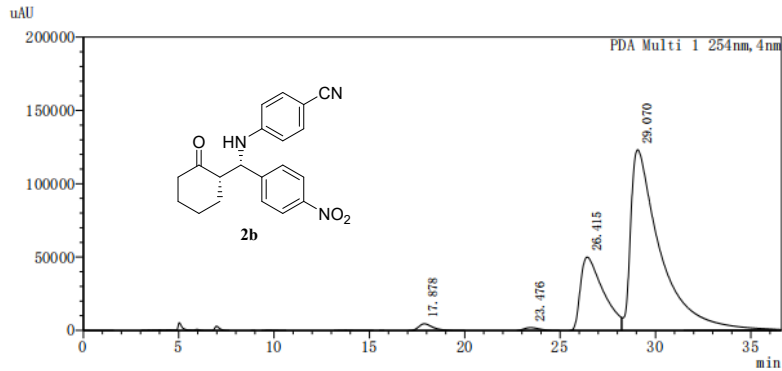

|   | RT(min) | Area     | Height | Area (%) | Height (%) |
|---|---------|----------|--------|----------|------------|
| 1 | 17.878  | 290965   | 5385   | 1.600    | 2.946      |
| 2 | 23.476  | 150334   | 2329   | 0.827    | 1.274      |
| 3 | 26.415  | 4324956  | 51480  | 23.779   | 28.164     |
| 4 | 29.070  | 13422143 | 123594 | 73.795   | 67.616     |



SHIMADZU  
LabSolutions Analysis

Sample Information

Sample Name: 2c RAC  
 Sample Type : Mannich Reaction  
 Method Name : AD-H 70-30-0.8mL  
 Batch Name : 1021.lcb  
 sample number :  
 Injection Volume : 10 uL  
 Acquisition Date : 2023/1/8 19:00:22 Operator : System Administrator  
 Modified Date : 2023/1/8 19:17:44 Modifield by : WC

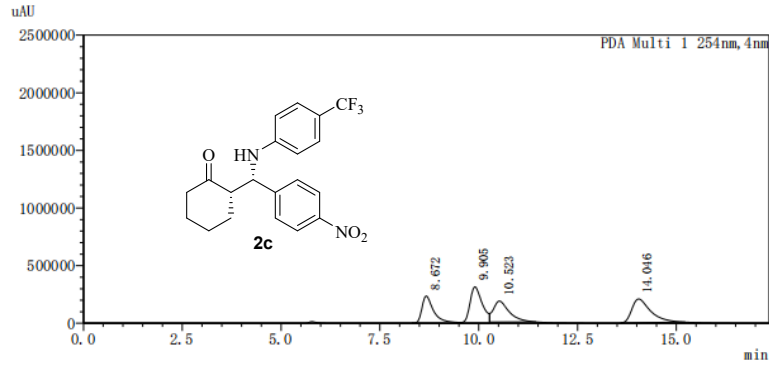

| PDA Ch1 254nm |          |         |        |          |            |
|---------------|----------|---------|--------|----------|------------|
|               | RT (min) | Area    | Height | Area (%) | Height (%) |
| 1             | 8.672    | 4929618 | 236191 | 20.896   | 25.162     |
| 2             | 9.905    | 6808533 | 315205 | 28.860   | 33.579     |
| 3             | 10.523   | 5053624 | 180981 | 21.422   | 19.280     |
| 4             | 14.046   | 6799490 | 206311 | 28.822   | 21.979     |

SHIMADZU  
LabSolutions Analysis

Sample Information

Sample Name: 2c  
 Sample Type : Mannich Reaction  
 Method Name : AD-H 70-30-0.8mL  
 Batch Name : 1021.lcb  
 sample number :  
 Injection Volume : 10 uL  
 Acquisition Date : 2023/1/8 17:32:50 Operator : System Administrator  
 Modified Date : 2023/1/8 17:51:32 Modifield by : WC

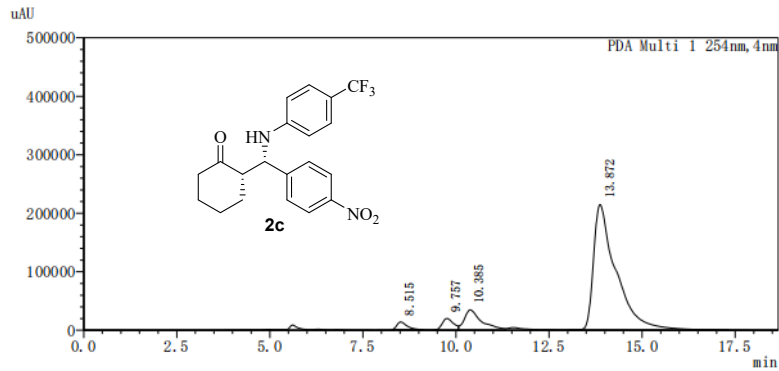

| PDA Ch1 254nm |          |         |        |          |            |
|---------------|----------|---------|--------|----------|------------|
|               | RT (min) | Area    | Height | Area (%) | Height (%) |
| 1             | 8.515    | 238240  | 12976  | 2.202    | 4.603      |
| 2             | 9.757    | 423139  | 19872  | 3.911    | 7.049      |
| 3             | 10.385   | 1111329 | 34640  | 10.271   | 12.287     |
| 4             | 13.872   | 9047312 | 214427 | 83.616   | 76.061     |

SHIMADZU  
LabSolutions Analysis

Sample Information

Sample Name: 2d RAC  
 Sample Type : Mannich Reaction  
 Method Name : AD-II 85-15-1mL  
 Batch Name : 1021.lcb  
 sample number :  
 Injection Volume : 10 uL  
 Acquisition Date : 2023/1/8 21:30:39 Operator : System Administrator  
 Modified Date : 2023/1/8 21:50:46 Modifield by : WC

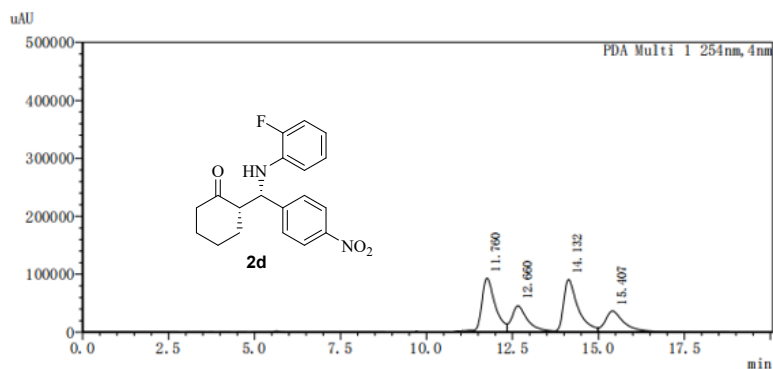

| PDA Ch1 254nm |         |        |          |            |  |
|---------------|---------|--------|----------|------------|--|
| RT (min)      | Area    | Height | Area (%) | Height (%) |  |
| 1             | 2547344 | 93891  | 31.181   | 35.140     |  |
| 2             | 1503216 | 45771  | 18.400   | 17.130     |  |
| 3             | 2684317 | 91046  | 32.858   | 34.075     |  |
| 4             | 1434555 | 36483  | 17.560   | 13.654     |  |

SHIMADZU  
LabSolutions Analysis

Sample Information

Sample Name: Mannich  
 Sample Type : 139-1  
 Method Name : AD-II 85-15-1mL  
 Batch Name : 1021.lcb  
 sample number :  
 Injection Volume : 10 uL  
 Acquisition Date : 2023/1/8 21:56:21 Operator : System Administrator  
 Modified Date : 2023/1/8 22:15:20 Modifield by : WC

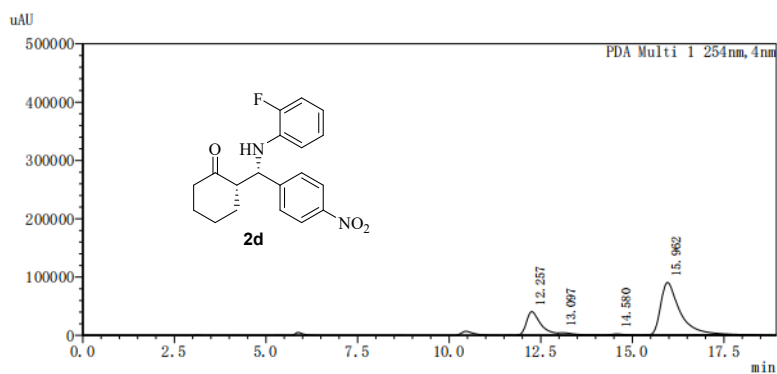

| PDA Ch1 254nm |         |        |          |            |  |
|---------------|---------|--------|----------|------------|--|
| RT (min)      | Area    | Height | Area (%) | Height (%) |  |
| 1             | 1106456 | 40649  | 24.073   | 29.660     |  |
| 2             | 132914  | 4237   | 2.892    | 3.091      |  |
| 3             | 54196   | 2074   | 1.179    | 1.513      |  |
| 4             | 3302654 | 90092  | 71.856   | 65.736     |  |

SHIMADZU LabSolutions Analysis

Sample Information

Sample Name: LK-M-139-9 rac  
 Sample Type : Mannich  
 Method Name : AD-H-80-20-1ml  
 Batch Name : 1021.lcb  
 sample number :  
 Injection Volume : 10 uL  
 Acquisition Date : 2023/1/11 11:07:55 Operator : System Administrator  
 Modified Date : 2023/1/11 11:32:06 Modifield by : WC

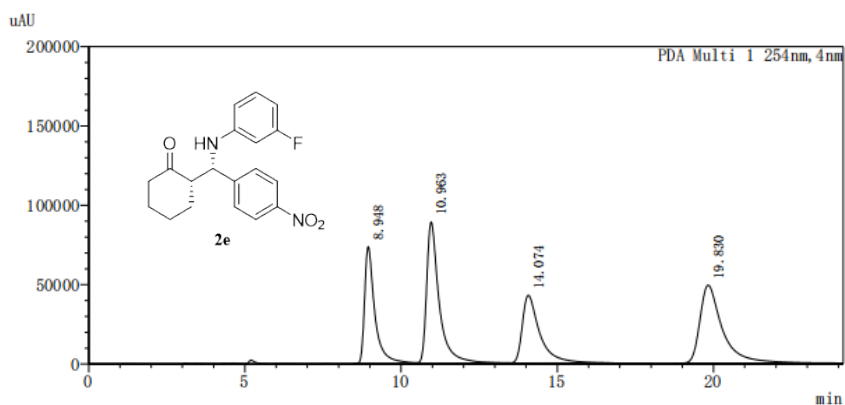

| RT (min) | Area    | Height | Area (%) | Height (%) |
|----------|---------|--------|----------|------------|
| 1 8.948  | 1689435 | 73677  | 20.374   | 28.941     |
| 2 10.963 | 2481212 | 89056  | 29.923   | 34.982     |
| 3 14.074 | 1660899 | 42705  | 20.030   | 16.775     |
| 4 19.830 | 2460523 | 49137  | 29.673   | 19.301     |

SHIMADZU LabSolutions Analysis

Sample Information

Sample Name: LK-M-139-9  
 Sample Type : Mannich  
 Method Name : AD-H 80-20-1ml  
 Batch Name : 1021.lcb  
 sample number :  
 Injection Volume : 10 uL  
 Acquisition Date : 2023/1/11 14:40:22 Operator : System Administrator  
 Modified Date : 2023/1/11 15:03:28 Modifield by : WC

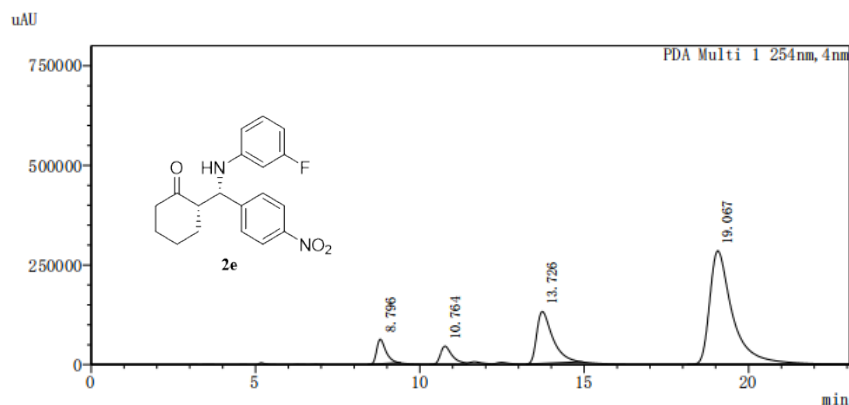

| RT (min) | Area     | Height | Area (%) | Height (%) |
|----------|----------|--------|----------|------------|
| 1 8.796  | 1206974  | 61642  | 5.835    | 11.790     |
| 2 10.764 | 1177395  | 46039  | 5.692    | 8.806      |
| 3 13.726 | 4416518  | 130338 | 21.351   | 24.929     |
| 4 19.067 | 13883948 | 284824 | 67.121   | 54.476     |

SHIMADZU  
LabSolutions Analysis

Sample Information

Sample Name: Mannich  
 Sample Type : 125-23 Rac  
 Method Name : AD-H -80-20-1mL  
 Batch Name : 1021.lcb  
 sample number :  
 Injection Volume : 10 uL  
 Acquisition Date : 2023/4/14 15:43:42 Operator : System Administrator  
 Modified Date : 2023/4/14 16:26:43 Modifield by : WC

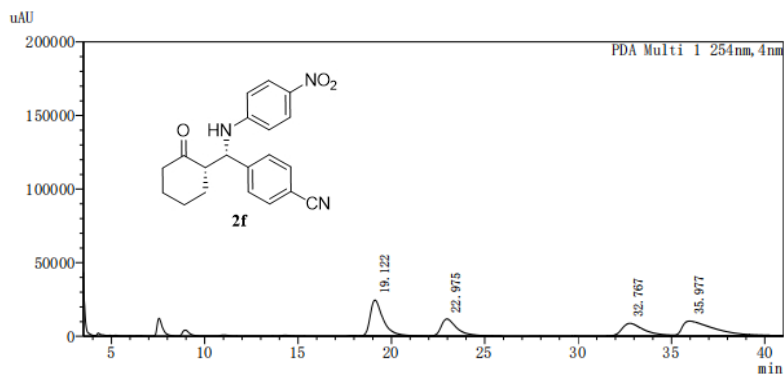

| RT (min) | Area    | Height | Area (%) | Height (%) |
|----------|---------|--------|----------|------------|
| 1 19.122 | 1152855 | 24138  | 31.353   | 44.476     |
| 2 22.975 | 682937  | 11633  | 18.573   | 21.434     |
| 3 32.767 | 686816  | 8513   | 18.678   | 15.685     |
| 4 35.977 | 1154436 | 9988   | 31.396   | 18.404     |

SHIMADZU  
LabSolutions Analysis

Sample Information

Sample Name: Mannich  
 Sample Type : 125-23  
 Method Name : AD-H 80-20-1mL  
 Batch Name : 1021.lcb  
 sample number :  
 Injection Volume : 10 uL  
 Acquisition Date : 2023/4/14 19:11:40 Operator : System Administrator  
 Modified Date : 2023/4/14 20:01:51 Modifield by : WC

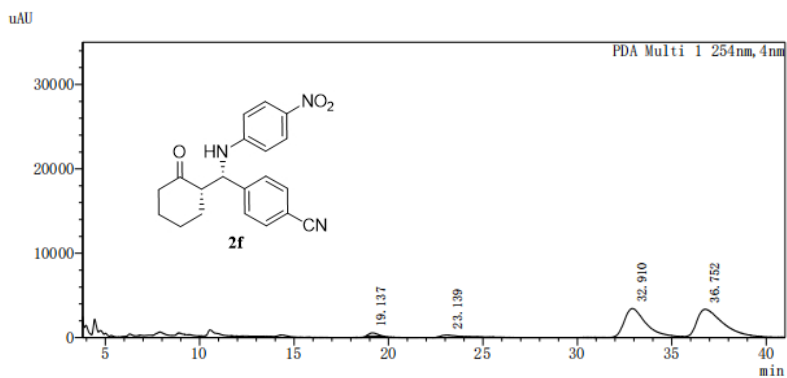

| RT (min) | Area   | Height | Area (%) | Height (%) |
|----------|--------|--------|----------|------------|
| 1 19.137 | 11496  | 370    | 1.645    | 4.836      |
| 2 23.139 | 18644  | 298    | 2.668    | 3.902      |
| 3 32.910 | 293223 | 3507   | 41.955   | 45.873     |
| 4 36.752 | 375541 | 3470   | 53.733   | 45.389     |

SHIMADZU LabSolutions Analysis

Sample Information

Sample Name: LK-M-143-1 RAC  
 Sample Type : AD-H80-20-1ML  
 Method Name : Mannich  
 Batch Name : 1021.lcb  
 sample number :  
 Injection Volume : 10 uL  
 Acquisition Date : 2023/1/10 14:36:59 Operator : System Administrator  
 Modified Date : 2023/1/10 15:16:51 Modifield by : WC

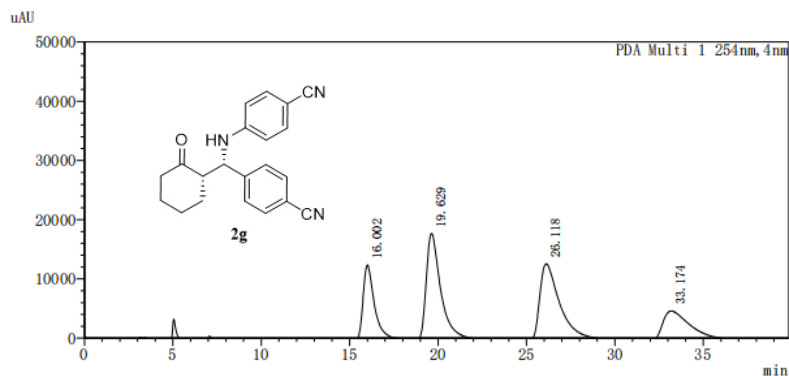

| RT (min) | Area    | Height | Area (%) | Height (%) |
|----------|---------|--------|----------|------------|
| 1 16.002 | 555966  | 12675  | 17.798   | 26.068     |
| 2 19.629 | 1019499 | 18001  | 32.637   | 37.022     |
| 3 26.118 | 1003161 | 12940  | 32.114   | 26.614     |
| 4 33.174 | 545094  | 5006   | 17.450   | 10.296     |

SHIMADZU LabSolutions Analysis

Sample Information

Sample Name: LK-M-143-1  
 Sample Type : AD-H 80-20-1ML  
 Method Name : Mannich  
 Batch Name : 1021.lcb  
 sample number :  
 Injection Volume : 10 uL  
 Acquisition Date : 2023/1/10 17:27:37 Operator : System Administrator  
 Modified Date : 2023/1/10 18:08:18 Modifield by : WC

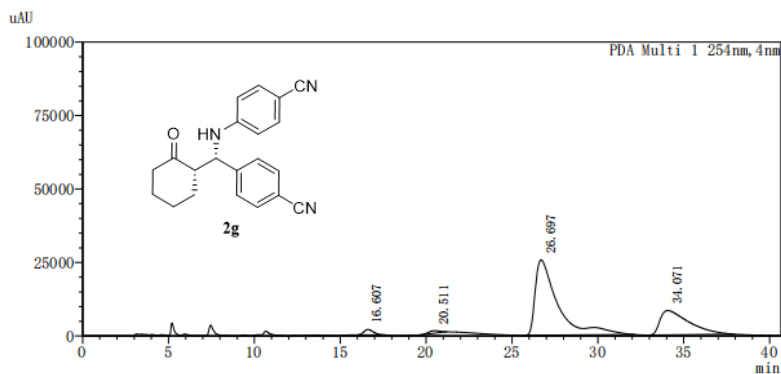

| RT (min) | Area    | Height | Area (%) | Height (%) |
|----------|---------|--------|----------|------------|
| 1 16.607 | 69664   | 1841   | 2.039    | 5.036      |
| 2 20.511 | 38288   | 830    | 1.121    | 2.269      |
| 3 26.697 | 2336477 | 25603  | 68.396   | 70.036     |
| 4 34.071 | 971654  | 8283   | 28.444   | 22.658     |

SHIMADZU LabSolutions Analysis

Sample Information

Sample Name: LK-M-136-3  
 Sample Type : Unknown  
 Method Name : Mannich  
 Batch Name : 1021.lcb  
 sample number :  
 Injection Volume : 10 uL  
 Acquisition Date : 2023/1/5 21:36:14 Operator : System Administrator  
 Modified Date : 2023/1/5 22:04:35 Modified by : WC

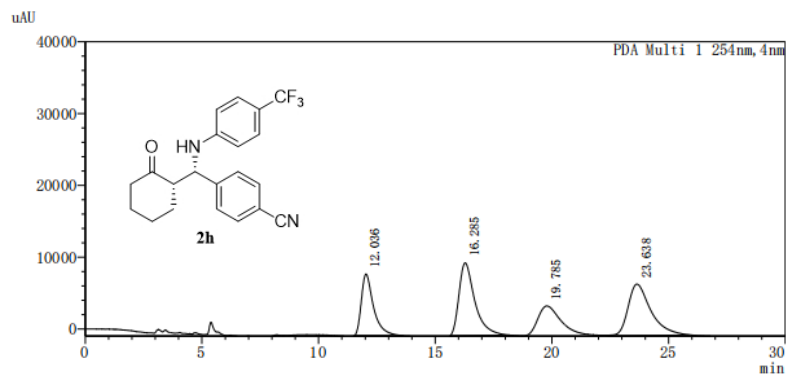

| PDA Ch1 254nm |          |        |        |          |            |
|---------------|----------|--------|--------|----------|------------|
|               | RT (min) | Area   | Height | Area (%) | Height (%) |
| 1             | 12.036   | 310701 | 8580   | 19.602   | 28.461     |
| 2             | 16.285   | 477527 | 10136  | 30.128   | 33.624     |
| 3             | 19.785   | 311613 | 4269   | 19.660   | 14.160     |
| 4             | 23.638   | 485174 | 7161   | 30.610   | 23.755     |

SHIMADZU LabSolutions Analysis

Sample Information

Sample Name: LK-136-3  
 Sample Type : Unknown  
 Method Name : Mannich  
 Batch Name : 1021.lcb  
 sample number :  
 Injection Volume : 10 uL  
 Acquisition Date : 2023/1/5 22:12:49 Operator : System Administrator  
 Modified Date : 2023/1/5 22:44:36 Modified by : WC

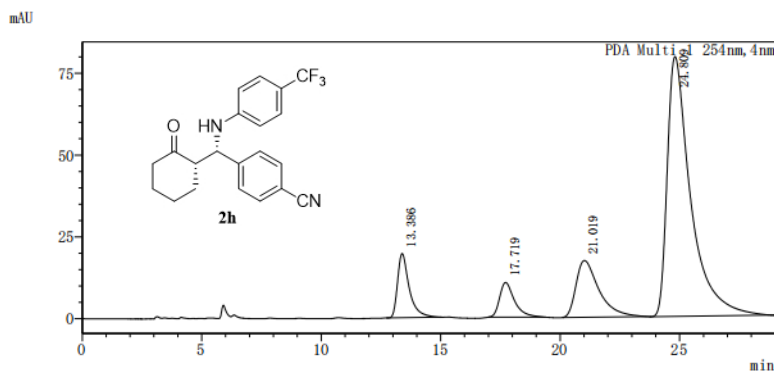

| PDA Ch1 254nm |          |         |        |          |            |
|---------------|----------|---------|--------|----------|------------|
|               | RT (min) | Area    | Height | Area (%) | Height (%) |
| 1             | 13.386   | 665179  | 19605  | 8.643    | 15.448     |
| 2             | 17.719   | 458941  | 10587  | 5.963    | 8.342      |
| 3             | 21.019   | 1161184 | 17330  | 15.088   | 13.656     |
| 4             | 24.809   | 5410944 | 79387  | 70.306   | 62.554     |

SHIMADZU  
LabSolutions Analysis

Sample Information

Sample Name: LK-M-136-14  
 Sample Type : Unknown  
 Method Name : Mannich  
 Batch Name : 1021.lcb  
 sample number :  
 Injection Volume : 10 uL  
 Acquisition Date : 2023/1/4 20:02:11 Operator : System Administrator  
 Modified Date : 2023/1/4 20:29:34 Modifield by : WC

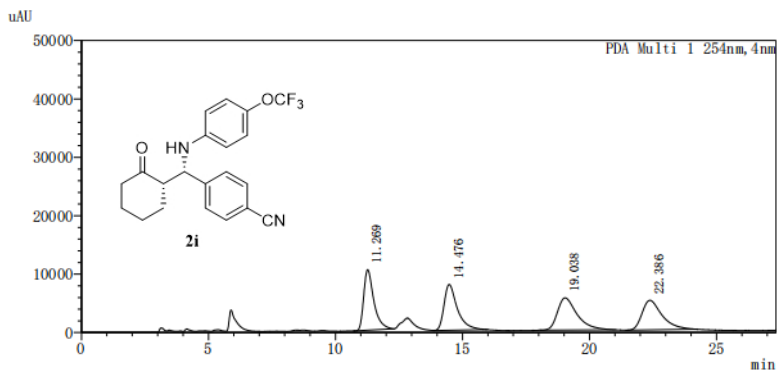

| PDA Ch1 254nm |         |        |        |          |            |
|---------------|---------|--------|--------|----------|------------|
|               | RT(min) | Area   | Height | Area (%) | Height (%) |
| 1             | 11.269  | 288470 | 10387  | 25.123   | 36.047     |
| 2             | 14.476  | 285044 | 7841   | 24.825   | 27.212     |
| 3             | 19.038  | 297185 | 5518   | 25.882   | 19.150     |
| 4             | 22.386  | 277525 | 5069   | 24.170   | 17.592     |

SHIMADZU  
LabSolutions Analysis

Sample Information

Sample Name: LK-M-136-14  
 Sample Type : Unknow  
 Method Name : Mannich  
 Batch Name : 1021.lcb  
 sample number :  
 Injection Volume : 10 uL  
 Acquisition Date : 2023/1/4 19:21:33 Operator : System Administrator  
 Modified Date : 2023/1/4 19:48:50 Modifield by : WC

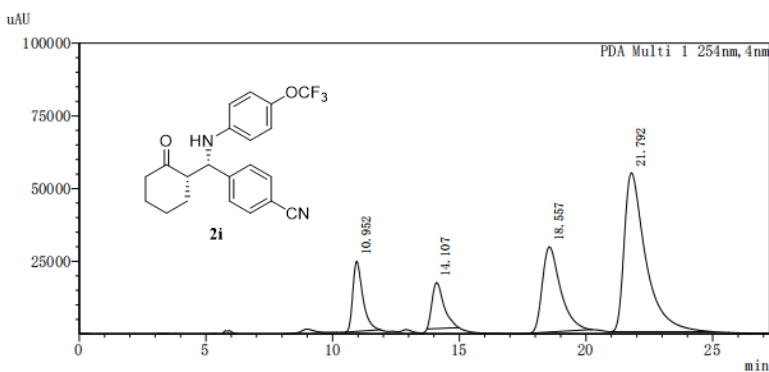

| PDA Ch1 254nm |         |         |        |          |            |
|---------------|---------|---------|--------|----------|------------|
|               | RT(min) | Area    | Height | Area (%) | Height (%) |
| 1             | 10.952  | 661518  | 24099  | 11.300   | 19.472     |
| 2             | 14.107  | 514299  | 15776  | 8.785    | 12.747     |
| 3             | 18.557  | 1466617 | 29295  | 25.053   | 23.670     |
| 4             | 21.792  | 3211527 | 54594  | 54.861   | 44.111     |

Sample Information

Sample Name: LK-M-141-9RAC  
 Sample Type : M  
 Method Name : AD-H 85-15-1ml  
 Batch Name : 1021.lcb  
 sample number :  
 Injection Volume : 10 uL  
 Acquisition Date : 2023/2/20 11:29:10 Operator : System Administrator  
 Modified Date : 2023/2/20 12:10:48 Modifield by : WC

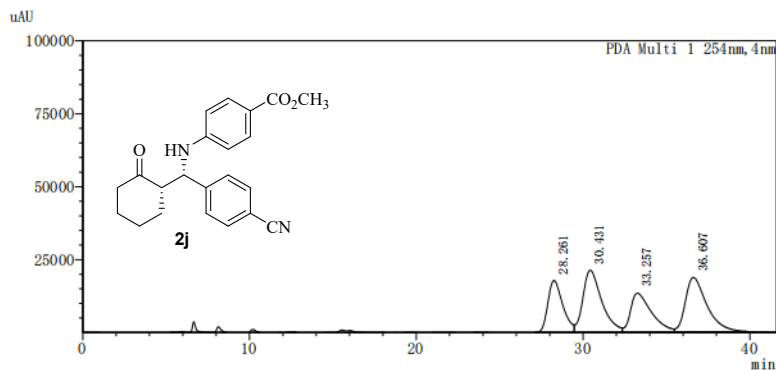

| PDA Ch1 254nm |          |         |        |          |            |
|---------------|----------|---------|--------|----------|------------|
|               | RT (min) | Area    | Height | Area (%) | Height (%) |
| 1             | 28.261   | 1107636 | 17839  | 19.787   | 25.064     |
| 2             | 30.431   | 1673683 | 21317  | 29.898   | 29.951     |
| 3             | 33.257   | 1157739 | 13368  | 20.682   | 18.783     |
| 4             | 36.607   | 1658856 | 18649  | 29.633   | 26.202     |

Sample Information

Sample Name: LK-M-150-9  
 Sample Type : AD-H 85-15-1ml  
 Method Name : Mannich  
 Batch Name : 1021.lcb  
 sample number :  
 Injection Volume : 10 uL  
 Acquisition Date : 2023/2/20 12:15:55 Operator : System Administrator  
 Modified Date : 2023/2/20 13:01:40 Modifield by : WC

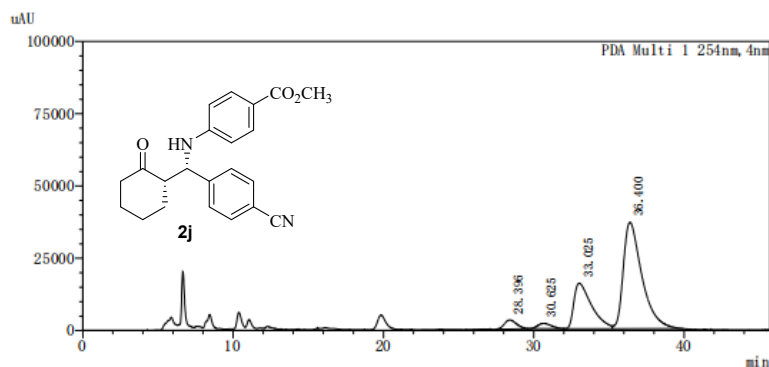

| PDA Ch1 254nm |          |         |        |          |            |
|---------------|----------|---------|--------|----------|------------|
|               | RT (min) | Area    | Height | Area (%) | Height (%) |
| 1             | 28.396   | 175301  | 3134   | 3.689    | 5.447      |
| 2             | 30.625   | 114508  | 1823   | 2.410    | 3.169      |
| 3             | 33.025   | 1283501 | 15749  | 27.011   | 27.374     |
| 4             | 36.400   | 3178500 | 36827  | 66.890   | 64.010     |



SHIMADZU  
LabSolutions Analysis

Sample Information

Sample Name: LK-M-150-25 RAC  
 Sample Type : AD-H 90-10-1ML  
 Method Name : Mannich  
 Batch Name : 1021.lcb  
 sample number :  
 Injection Volume : 10 uL  
 Acquisition Date : 2023/3/3 16:26:25 Operator : System Administrator  
 Modified Date : 2023/3/3 17:14:38 Modifield by : WC

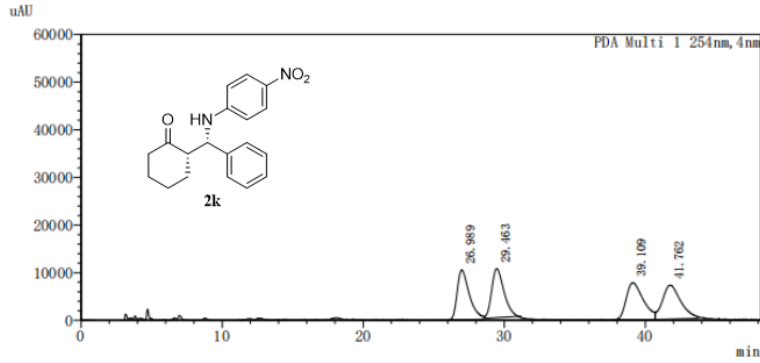

| PDA Ch1 254nm |        |        |          |            |        |
|---------------|--------|--------|----------|------------|--------|
| RT (min)      | Area   | Height | Area (%) | Height (%) |        |
| 1             | 26.989 | 621999 | 10440    | 24.552     | 29.306 |
| 2             | 29.463 | 620789 | 10315    | 24.504     | 28.954 |
| 3             | 39.109 | 647555 | 7728     | 25.561     | 21.692 |
| 4             | 41.762 | 643058 | 7142     | 25.383     | 20.048 |

SHIMADZU  
LabSolutions Analysis

Sample Information

Sample Name: LK-M-150-25  
 Sample Type : Unknow  
 Method Name : AD-H-90-10-1ml  
 Batch Name : 1021.lcb  
 sample number :  
 Injection Volume : 10 uL  
 Acquisition Date : 2023/3/1 14:48:17 Operator : System Administrator  
 Modified Date : 2023/3/1 15:39:58 Modifield by : WC

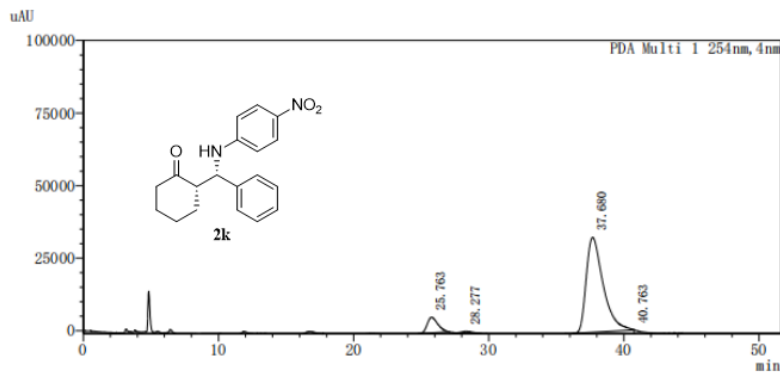

| PDA Ch1 254nm |        |         |          |            |        |
|---------------|--------|---------|----------|------------|--------|
| RT (min)      | Area   | Height  | Area (%) | Height (%) |        |
| 1             | 25.763 | 289196  | 5297     | 8.988      | 13.234 |
| 2             | 28.277 | 28313   | 559      | 0.880      | 1.397  |
| 3             | 37.680 | 2845516 | 32675    | 88.436     | 81.641 |
| 4             | 40.763 | 54587   | 1492     | 1.696      | 3.727  |

SHIMADZU LabSolutions Analysis

Sample Information

Sample Name: LK-M-150-26 RAC  
 Sample Type : AD-H 80-20-1ML  
 Method Name : Mannich  
 Batch Name : 1021.lcb  
 sample number :  
 Injection Volume : 10 uL  
 Acquisition Date : 2023/2/26 19:31:24 Operator : System Administrator  
 Modified Date : 2023/2/26 19:59:26 Modifield by : WC

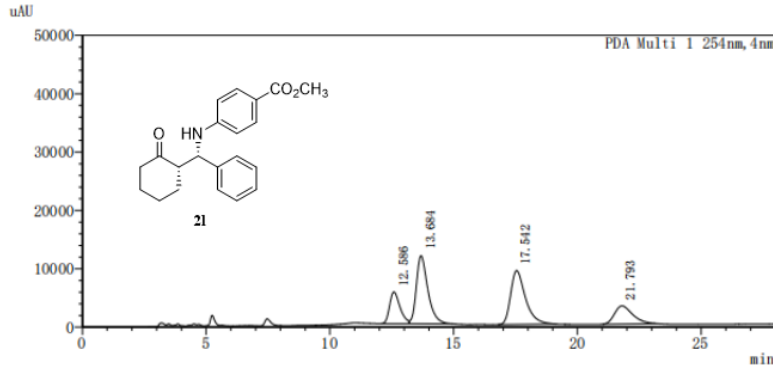

| PDA Ch1 254nm |          |        |        |          |            |
|---------------|----------|--------|--------|----------|------------|
|               | RT (min) | Area   | Height | Area (%) | Height (%) |
| 1             | 12.586   | 159005 | 5435   | 14.748   | 18.476     |
| 2             | 13.684   | 378035 | 11649  | 35.064   | 39.599     |
| 3             | 17.542   | 383931 | 9230   | 35.611   | 31.375     |
| 4             | 21.793   | 157156 | 3104   | 14.577   | 10.550     |

SHIMADZU LabSolutions Analysis

Sample Information

Sample Name: Mannich  
 Sample Type : 150-26  
 Method Name : AD-H 80-20-1mL  
 Batch Name : 1021.lcb  
 sample number :  
 Injection Volume : 10 uL  
 Acquisition Date : 2023/3/1 21:14:41 Operator : System Administrator  
 Modified Date : 2023/3/1 21:35:44 Modifield by : WC

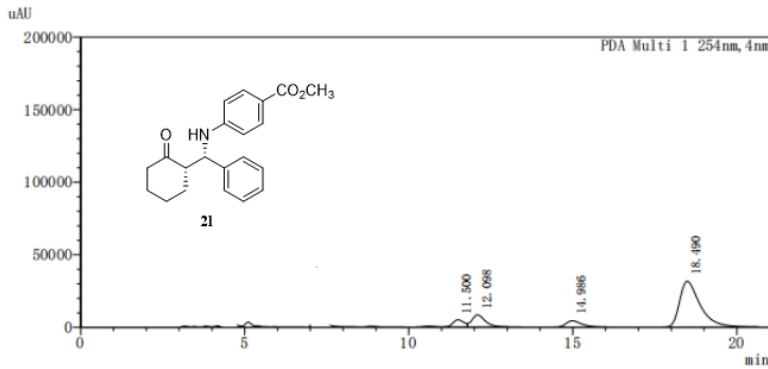

| PDA Ch1 254nm |          |         |        |          |            |
|---------------|----------|---------|--------|----------|------------|
|               | RT (min) | Area    | Height | Area (%) | Height (%) |
| 1             | 11.500   | 114635  | 4947   | 6.151    | 10.049     |
| 2             | 12.098   | 231072  | 8332   | 12.399   | 16.926     |
| 3             | 14.986   | 144827  | 4372   | 7.771    | 8.881      |
| 4             | 18.490   | 1373074 | 31575  | 73.678   | 64.144     |

Sample Information

Sample Name: 2019022051-0  
 Sample Type : Unknow  
 Method Name : Mannich cat5%  
 Batch Name : 20190104.1cb  
 sample number :  
 Injection Volume : 10 uL  
 Acquisition Date : 2019/3/4 14:41:15 Operator : System Administrator  
 Modified Date : 2019/11/1 11:14:13 Modifield by : yzy

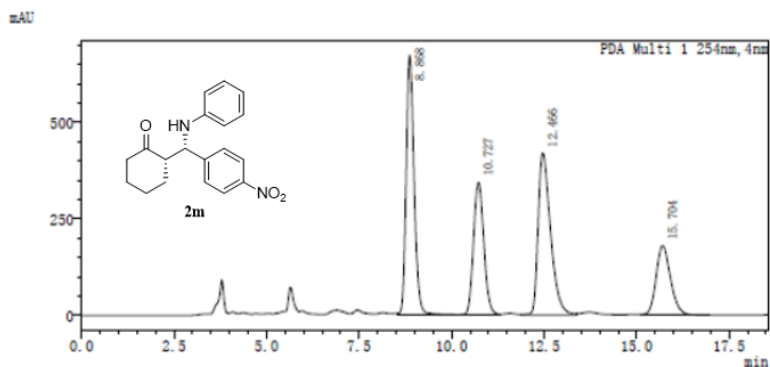

| RT (min) | Area     | Height | Area (%) | Height (%) |
|----------|----------|--------|----------|------------|
| 1 8.868  | 10087523 | 671651 | 31.967   | 41.619     |
| 2 10.727 | 6740670  | 343009 | 21.361   | 21.255     |
| 3 12.466 | 9541360  | 419439 | 31.157   | 25.991     |
| 4 15.704 | 4386683  | 179716 | 15.486   | 11.136     |

Sample Information

Sample Name: 2m  
 Sample Type : Unknow  
 Method Name :  
 Batch Name : 20190104.1cb  
 sample number :  
 Injection Volume : 10 uL  
 Acquisition Date : 2019/3/2 11:53:17 Operator : System Administrator  
 Modified Date : 2019/3/2 12:14:17 Modifield by : WC

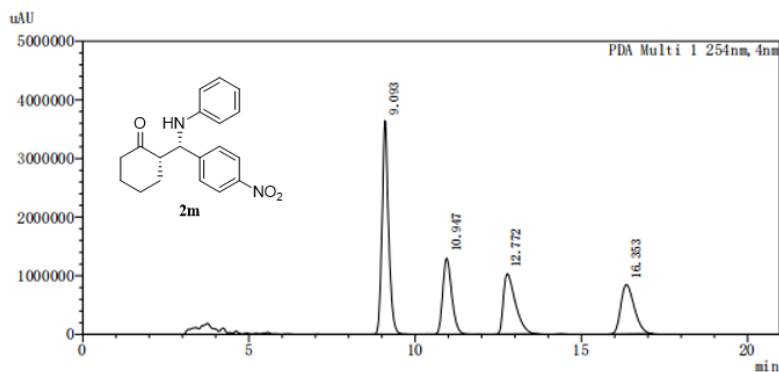

| RT (min) | Area     | Height  | Area (%) | Height (%) |
|----------|----------|---------|----------|------------|
| 1 9.093  | 49629631 | 3637823 | 39.943   | 53.414     |
| 2 10.947 | 24583628 | 1297906 | 19.785   | 19.057     |
| 3 12.772 | 26127308 | 1030152 | 21.028   | 15.126     |
| 4 16.353 | 23911546 | 844784  | 19.244   | 12.404     |

Sample Information

Sample Name: 2n rac  
 Sample Type : Unknow  
 Method Name : Mannich cat5%  
 Batch Name : 20190104.lcb  
 sample number :  
 Injection Volume : 10 uL  
 Acquisition Date : 2019/3/21 21:47:38 Operator : System Administrator  
 Modified Date : 2019/3/21 22:10:53 Modifield by : WC

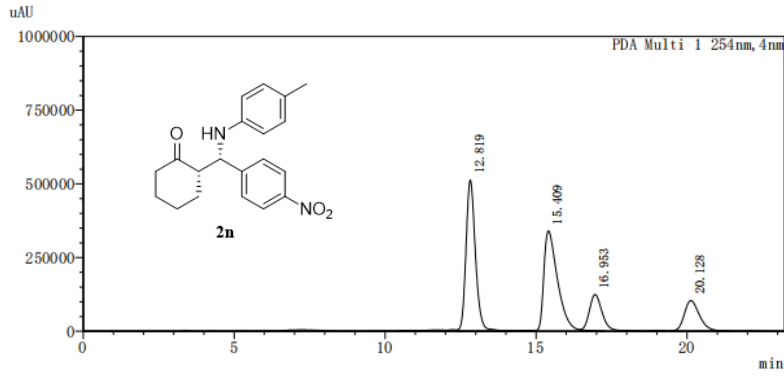

PDA Ch1 254nm

| RT (min) | Area   | Height   | Area (%) | Height (%) |        |
|----------|--------|----------|----------|------------|--------|
| 1        | 12.819 | 11120725 | 512235   | 37.225     | 47.145 |
| 2        | 15.409 | 11354440 | 347216   | 38.007     | 31.957 |
| 3        | 16.953 | 3726559  | 123351   | 12.474     | 11.353 |
| 4        | 20.128 | 3672931  | 103708   | 12.294     | 9.545  |

Sample Information

Sample 2n  
 Sample Type : 2n  
 Method Name : AD-H 70-30-1mL  
 Batch Name : 1021.lcb  
 sample number :  
 Injection Volume : 10 uL  
 Acquisition Date : 2023/4/9 18:36:09 Operator : System Administrator  
 Modified Date : 2023/4/9 18:59:44 Modifield by : WC

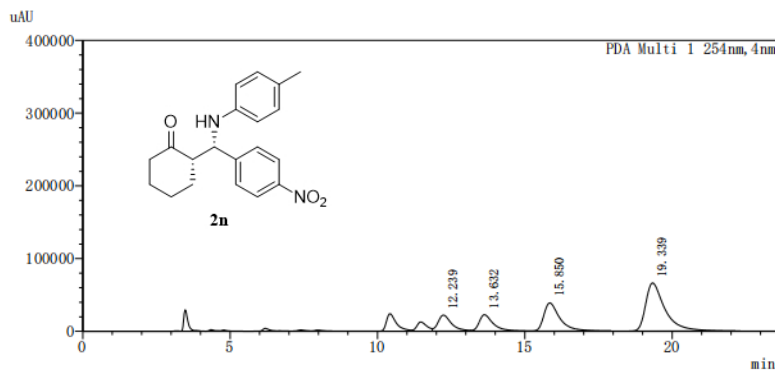

PDA Ch1 254nm

| RT (min) | Area   | Height  | Area (%) | Height (%) |        |
|----------|--------|---------|----------|------------|--------|
| 1        | 12.239 | 694280  | 21869    | 11.776     | 14.683 |
| 2        | 13.632 | 748723  | 22425    | 12.700     | 15.056 |
| 3        | 15.850 | 1452627 | 38587    | 24.639     | 25.907 |
| 4        | 19.339 | 2999986 | 66061    | 50.885     | 44.354 |

Sample Information

Sample Name: 2o RAC  
 Sample Type : Mannich Reaction  
 Method Name : AD-H 80-20-1mL  
 Batch Name : 1021.lcb  
 sample number :  
 Injection Volume : 10 uL  
 Acquisition Date : 2023/1/5 19:57:59 Operator : System Administrator  
 Modified Date : 2023/1/5 20:25:37 Modified by : WC

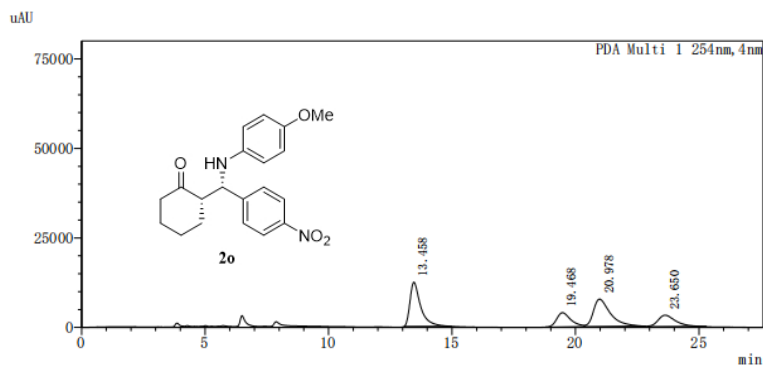

| RT (min) | Area   | Height | Area (%) | Height (%) |
|----------|--------|--------|----------|------------|
| 1        | 369684 | 12329  | 35.276   | 45.441     |
| 2        | 158858 | 3976   | 15.159   | 14.655     |
| 3        | 364774 | 7652   | 34.808   | 28.202     |
| 4        | 154650 | 3175   | 14.757   | 11.702     |

Sample Information

Sample Name: 2o  
 Sample Type : Mannich Reaction  
 Method Name : AD-H 80-20-1mL  
 Batch Name : 1021.lcb  
 sample number :  
 Injection Volume : 10 uL  
 Acquisition Date : 2023/1/5 20:27:23 Operator : System Administrator  
 Modified Date : 2023/1/5 20:55:04 Modified by : WC

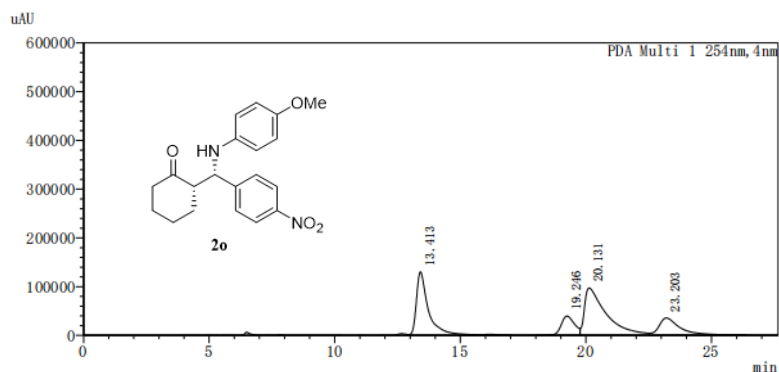

| RT (min) | Area    | Height | Area (%) | Height (%) |
|----------|---------|--------|----------|------------|
| 1        | 4358227 | 129968 | 32.125   | 43.173     |
| 2        | 1438927 | 39213  | 10.606   | 13.026     |
| 3        | 5743003 | 96803  | 42.332   | 32.157     |
| 4        | 2026318 | 35052  | 14.936   | 11.644     |

SHIMADZU  
LabSolutions Analysis

Sample Information

Sample Name: Mannich  
 Sample Type : 11pRAC  
 Method Name : AD-H 70-30-1mL  
 Batch Name : 1021.lcb  
 sample number :  
 Injection Volume : 10 uL  
 Acquisition Date : 2023/3/21 9:11:07  
 Modified Date : 2023/3/21 9:23:25  
 Operator : System Administrator  
 Modified by : WC

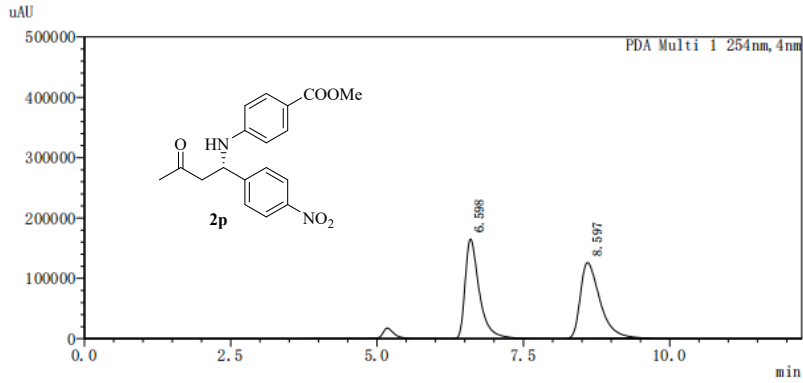

| RT (min) | Area    | Height | Area (%) | Height (%) |
|----------|---------|--------|----------|------------|
| 1 6.598  | 2917616 | 166182 | 49.835   | 56.868     |
| 2 8.597  | 2936881 | 126044 | 50.165   | 43.132     |

SHIMADZU  
LabSolutions Analysis

Sample Information

Sample Name: Mannich  
 Sample Type : 111p  
 Method Name : AD-H 70-30-1mL  
 Batch Name : 1021.lcb  
 sample number :  
 Injection Volume : 10 uL  
 Acquisition Date : 2023/4/8 8:46:30  
 Modified Date : 2023/4/8 9:04:43  
 Operator : System Administrator  
 Modified by : WC

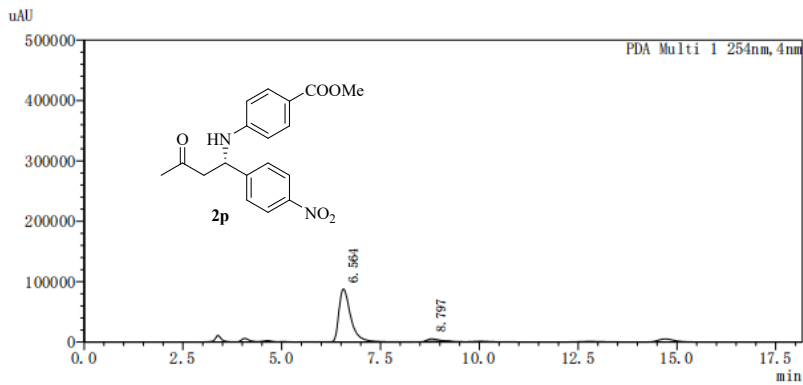

| RT (min) | Area    | Height | Area (%) | Height (%) |
|----------|---------|--------|----------|------------|
| 1 6.564  | 1880326 | 87915  | 96.077   | 95.638     |
| 2 8.797  | 76784   | 4010   | 3.923    | 4.362      |

SHIMADZU  
LabSolutions Analysis

Sample Information

Sample Name: 151RAC-64  
 Sample Type : mannich  
 Method Name : AD-H 70-30-1  
 Batch Name : 1021.lcb  
 sample number :  
 Injection Volume : 10 uL  
 Acquisition Date : 2023/3/26 10:11:38 Operator : System Administrator  
 Modified Date : 2023/3/26 10:22:44 Modifield by : WC

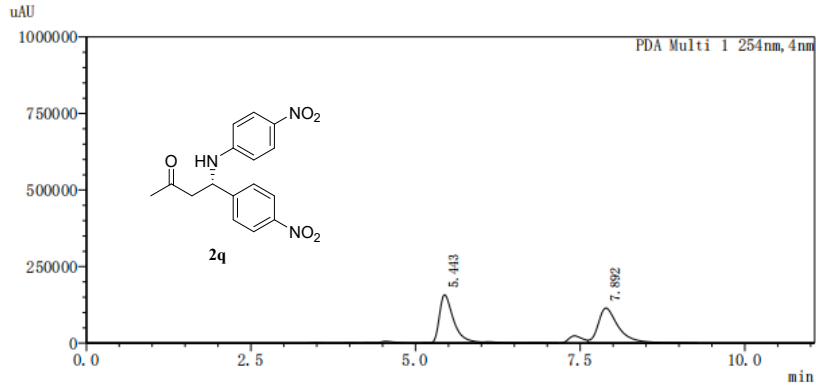

| RT(min) | Area  | Height  | Area (%) | Height (%) |        |
|---------|-------|---------|----------|------------|--------|
| 1       | 5.443 | 2446094 | 157556   | 50.021     | 57.963 |
| 2       | 7.892 | 2444016 | 114264   | 49.979     | 42.037 |

SHIMADZU  
LabSolutions Analysis

Sample Information

Sample Name: 151-64  
 Sample Type : mannich  
 Method Name : AD-H 70-30-1  
 Batch Name : 1021.lcb  
 sample number :  
 Injection Volume : 10 uL  
 Acquisition Date : 2023/3/26 9:53:49 Operator : System Administrator  
 Modified Date : 2023/3/26 10:09:10 Modifield by : WC

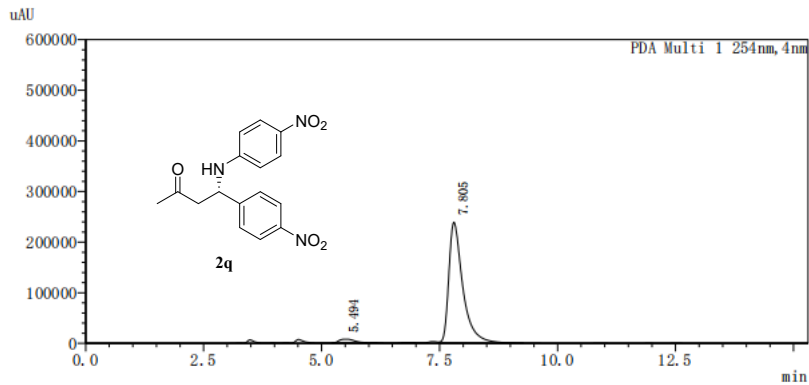

| RT(min) | Area  | Height  | Area (%) | Height (%) |        |
|---------|-------|---------|----------|------------|--------|
| 1       | 5.494 | 167594  | 7335     | 3.300      | 2.986  |
| 2       | 7.805 | 4911282 | 238302   | 96.700     | 97.014 |

SHIMADZU  
LabSolutions Analysis

Sample Information

Sample Name: Mannich  
 Sample Type : 151-71RAC  
 Method Name : AD-H 70-30-1 mL  
 Batch Name : 1021.lcb  
 sample number :  
 Injection Volume : 10 uL  
 Acquisition Date : 2023/4/10 13:06:36 Operator : System Administrator  
 Modified Date : 2023/4/10 13:15:54 Modifield by : WC

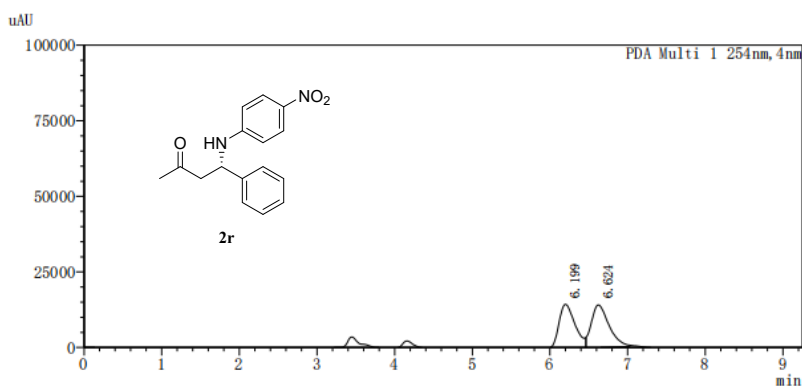

| PDA Ch1 254nm |          |        |        |          |            |
|---------------|----------|--------|--------|----------|------------|
|               | RT (min) | Area   | Height | Area (%) | Height (%) |
| 1             | 6.199    | 224256 | 14945  | 50.231   | 51.468     |
| 2             | 6.624    | 222191 | 14093  | 49.769   | 48.532     |

SHIMADZU  
LabSolutions Analysis

Sample Information

Sample Name: Mannich  
 Sample Type : 151-71  
 Method Name : AD-H70-30-1mL  
 Batch Name : 1021.lcb  
 sample number :  
 Injection Volume : 10 uL  
 Acquisition Date : 2023/4/10 12:38:46 Operator : System Administrator  
 Modified Date : 2023/4/10 12:54:25 Modifield by : WC

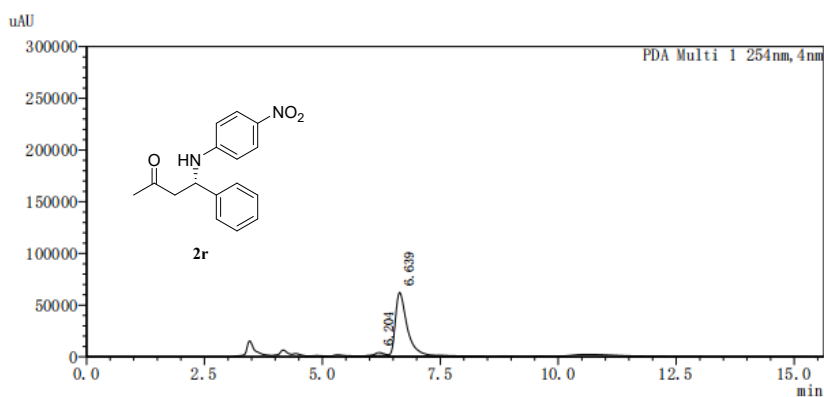

| PDA Ch1 254nm |          |         |        |          |            |
|---------------|----------|---------|--------|----------|------------|
|               | RT (min) | Area    | Height | Area (%) | Height (%) |
| 1             | 6.204    | 36317   | 2833   | 3.151    | 4.376      |
| 2             | 6.639    | 1116405 | 61907  | 96.849   | 95.624     |



SHIMADZU LabSolutions Analysis

Sample Information

Sample Name:Mannich  
 Sample Type : 151-109RAC  
 Method Name : AD-H 70-30-1mL  
 Batch Name : 1021.lcb  
 sample number :  
 Injection Volume : 10 uL  
 Acquisition Date : 2023/4/14 13:21:05 Operator : System Administrator  
 Modified Date : 2023/4/14 13:47:17 Modifield by : WC

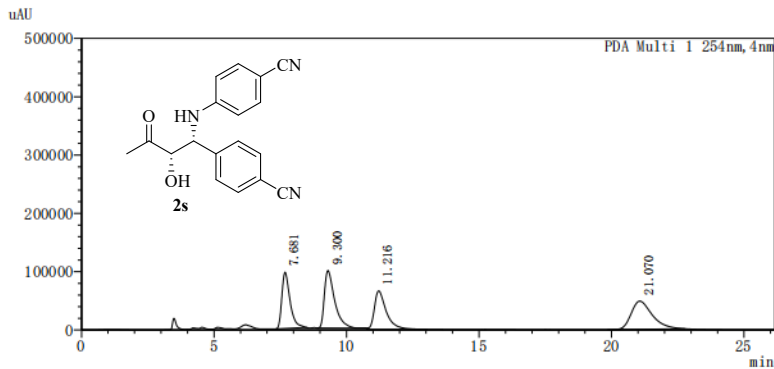

| PDA Ch1 254nm |         |         |        |          |            |
|---------------|---------|---------|--------|----------|------------|
|               | RT(min) | Area    | Height | Area (%) | Height (%) |
| 1             | 7.681   | 2067796 | 96418  | 21.903   | 31.169     |
| 2             | 9.300   | 2649489 | 98520  | 28.065   | 31.848     |
| 3             | 11.216  | 2076199 | 66237  | 21.992   | 21.412     |
| 4             | 21.070  | 2647011 | 48170  | 28.039   | 15.572     |

SHIMADZU LabSolutions Analysis

Sample Information

Sample Name:Mannich  
 Sample Type : 151-109  
 Method Name : AD-H 70-30-1mL  
 Batch Name : 1021.lcb  
 sample number :  
 Injection Volume : 10 uL  
 Acquisition Date : 2023/4/14 12:53:52 Operator : System Administrator  
 Modified Date : 2023/4/14 13:19:49 Modifield by : WC

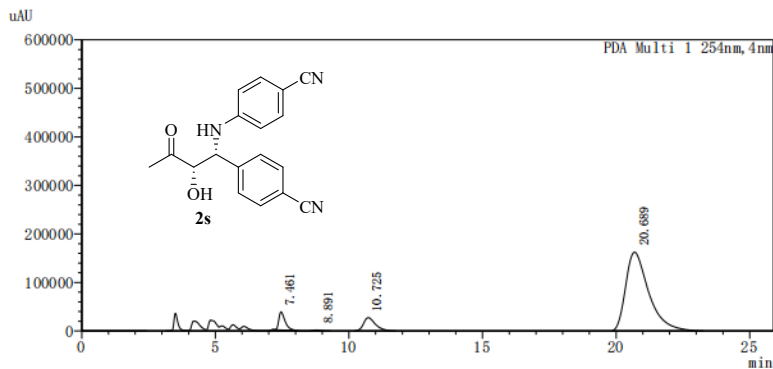

| PDA Ch1 254nm |         |          |        |          |            |
|---------------|---------|----------|--------|----------|------------|
|               | RT(min) | Area     | Height | Area (%) | Height (%) |
| 1             | 7.461   | 605216   | 37170  | 5.100    | 15.959     |
| 2             | 8.891   | 70902    | 2858   | 0.598    | 1.227      |
| 3             | 10.725  | 968444   | 28515  | 8.161    | 12.243     |
| 4             | 20.689  | 10221909 | 164364 | 86.141   | 70.571     |

Sample Information

Sample Name: Mannich  
 Sample Type : 151-110RAC  
 Method Name : AD-H 70-30-1mL  
 Batch Name : 1021.lcb  
 sample number :  
 Injection Volume : 10 uL  
 Acquisition Date : 2023/4/13 20:20:23 Operator : System Administrator  
 Modified Date : 2023/4/13 20:52:58 Modifield by : WC

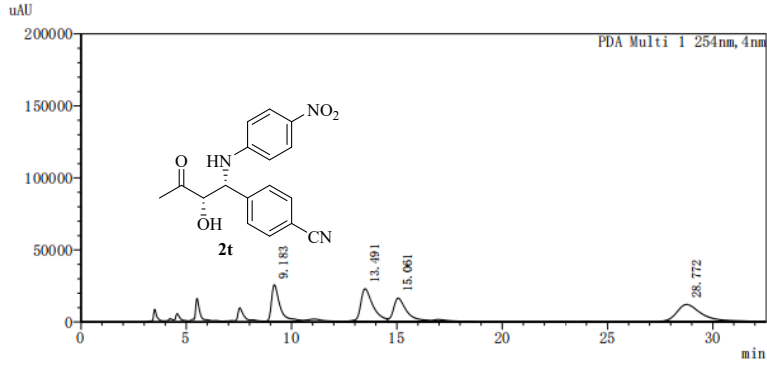

| RT (min) | Area   | Height | Area (%) | Height (%) |
|----------|--------|--------|----------|------------|
| 1 9.183  | 719884 | 25428  | 22.176   | 33.672     |
| 2 13.491 | 899934 | 22504  | 27.723   | 29.800     |
| 3 15.061 | 727183 | 15968  | 22.401   | 21.146     |
| 4 28.772 | 899194 | 11615  | 27.700   | 15.381     |

Sample Information

Sample Name: Mannich  
 Sample Type : 151-110  
 Method Name : AD-H 70-30-1mL  
 Batch Name : 1021.lcb  
 sample number :  
 Injection Volume : 10 uL  
 Acquisition Date : 2023/4/14 13:48:46 Operator : System Administrator  
 Modified Date : 2023/4/14 14:22:23 Modifield by : WC

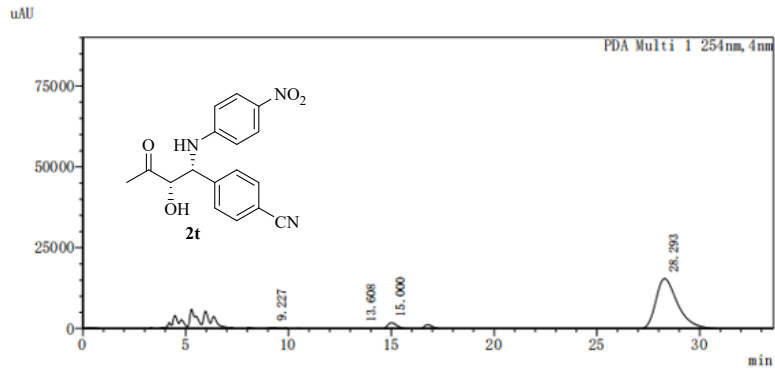

| RT (min) | Area    | Height | Area (%) | Height (%) |
|----------|---------|--------|----------|------------|
| 1 9.227  | 11196   | 368    | 0.866    | 1.985      |
| 2 13.608 | 8301    | 245    | 0.642    | 1.320      |
| 3 15.000 | 78279   | 2118   | 6.051    | 11.432     |
| 4 28.293 | 1195811 | 15799  | 92.441   | 85.263     |

Sample Information

Sample Name: Mannich  
 Sample Type : 151-112RAC  
 Method Name : AD-H 70-30-1mL  
 Batch Name : 1021.lcb  
 sample number :  
 Injection Volume : 10 uL  
 Acquisition Date : 2023/4/13 21:15:15 Operator : System Administrator  
 Modified Date : 2023/4/13 21:59:41 Modifield by : WC

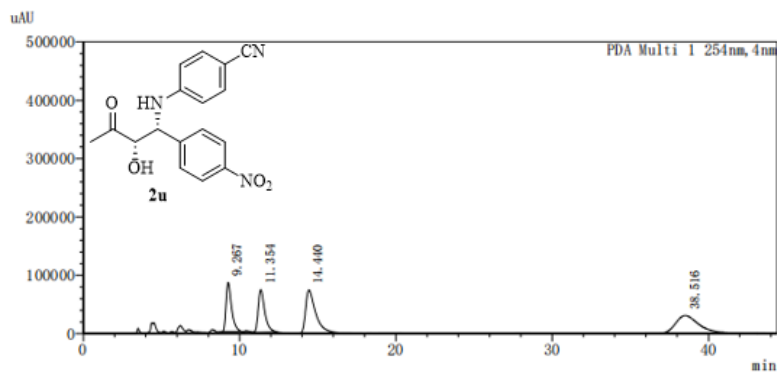

| RT (min) | Area    | Height | Area (%) | Height (%) |
|----------|---------|--------|----------|------------|
| 1 9.267  | 2106166 | 84090  | 19.405   | 32.131     |
| 2 11.354 | 2104117 | 72844  | 19.386   | 27.834     |
| 3 14.440 | 3324971 | 73902  | 30.634   | 28.238     |
| 4 38.516 | 3318496 | 30873  | 30.575   | 11.797     |

Sample Information

Sample Name: Mannich  
 Sample Type : 151-112  
 Method Name : AD-H 70-30-1mL  
 Batch Name : 1021.lcb  
 sample number :  
 Injection Volume : 10 uL  
 Acquisition Date : 2023/4/14 14:23:08 Operator : System Administrator  
 Modified Date : 2023/4/14 15:11:10 Modifield by : WC

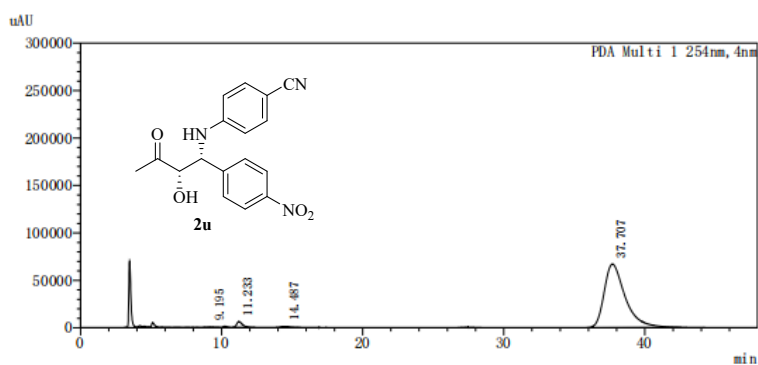

| RT (min) | Area    | Height | Area (%) | Height (%) |
|----------|---------|--------|----------|------------|
| 1 9.195  | 7560    | 358    | 0.106    | 0.479      |
| 2 11.233 | 176122  | 6146   | 2.461    | 8.240      |
| 3 14.487 | 54148   | 1186   | 0.757    | 1.590      |
| 4 37.707 | 6917903 | 66900  | 96.676   | 89.690     |
